## **Atomic Structure of the LL-37(17-29) Human Antimicrobial Peptide Reveals Functional Helical Fibril**

**One Sentence Summary:** Self-assembly of human and primate LL-37(17-29) into densely packed helical fibrils controls antibacterial activity.

**Authors:** Yizhaq Engelberg<sup>1</sup>, and Meytal Landau<sup>1,2,\*</sup>

### **Affiliations:**

<sup>1</sup> Department of Biology, Technion-Israel Institute of Technology, Haifa 3200003, Israel

<sup>2</sup> Centre for Structural Systems Biology (CSSB), and European Molecular Biology Laboratory (EMBL), Hamburg 22607, Germany

\*Correspondence to: [mlandau@technion.ac.il](mailto:mlandau@technion.ac.il)

Here we demonstrate, by crystal structures, the self-assembly of the human and primate antibacterial LL-37 active core (residues 17-29) into a densely packed hexameric fibrillar architecture of amphipathic helices. The fibril is composed of four-helix bundles with a hydrophobic core, while a network of polar interactions stabilizes contacts between bundles, overall forming a stable fibrillar configuration that is also thermostable in solution. Despite similarity in sequence and the formation of fibrils composed of amphipathic helices, the LL-37<sub>17-29</sub> fibril structure was significantly different from the cytotoxic bacterial PSM $\alpha$ 3 peptide, which fibrillates into amyloid cross- $\alpha$  fibrils. LL-37<sub>17-29</sub> formed wide, ribbon-like fibrils, which co-localized with bacterial cells; structure-guided mutagenesis analysis indicated the importance of its helical self-assembly in antibacterial activity and interactions with bacteria. This work extends the previously reported link between antibacterial activity and the formation of ordered amyloid fibrils, to helical, stable, hexameric fibrils. This fibril-antibacterial link suggests a tunable mechanism of action and offers a prospective to design antimicrobial peptides with improved stability and bioavailability.

Antimicrobial peptides (AMPs) are canonical components of the innate immune system of many organisms (1). AMP self-assembly bears functional relevance and can enhance antimicrobial activity (2). Certain AMPs assemble into well-ordered fibrils that resemble amyloids (3-8), which are proteins known to form cross- $\beta$  fibrils composed of tightly mated  $\beta$ -sheets, and have been associated with neurodegenerative and systemic diseases (9, 10). Correspondingly, recent evidence of antimicrobial properties among some human amyloids suggests a potential physiological role of otherwise known pathological proteins (4, 11-19). Human LL-37 (hLL-37) AMP, a hCAP-18 protein cleavage product, is also known to form fibrils (20). LL-37 is expressed by various mammalian cells and is considered to play an important role in the first line of defense against pathogens (21-26). Fibrillation of LL-37 was found critical for binding DNA and affecting receptors in the immune system (27). LL-37 forms helical structures (28), even when it assembles into oligomers and fibrils (29, 30), and is therefore distinct from the  $\beta$ -rich amyloid fibrils.

Our recent findings demonstrated cross- $\alpha$  fibrillation of the cytotoxic phenol-soluble modulin  $\alpha$ 3 (PSM $\alpha$ 3) peptide secreted by the pathogenic bacterium *Staphylococcus aureus* (31). These fibrils are composed entirely of  $\alpha$ -helices that stack perpendicular to the fibril axis into mated 'sheets', just as the  $\beta$ -strands assemble in amyloid cross- $\beta$  fibrils (31). Moreover, while PSM $\alpha$ 3 is toxic to human cells, some of its truncations and single-point mutations show antibacterial activity (32-35). Although originating from different organisms, PSM $\alpha$ 3 and hLL-37 display sequence homology, particularly in their core region (Fig. S1) and are cleaved in-vivo into active derivatives (36-42). Many hLL-37 derivatives show a diverse array of selectivity against microbial strains, and additional functions within the immune system (26, 36, 37, 43, 44).

The hLL-37<sub>17-29</sub> fragment was suggested to serve as the active core of the AMP, showing a different spectrum of antibacterial activity as compared to the full-length protein and other

fragments (45-47). Although not directly detected in-vivo, hLL-37<sub>17-29</sub> can be cleaved from hCAP-18 or LL-37 by either proteinase K or staphylococcal peptidase I on its N-terminal side, and by trypsin on its C-terminal side. hLL-37<sub>17-29</sub> is also the region within hLL-37 showing the highest sequence similarity to PSM $\alpha$ 3 (Fig. S1), and like the latter, forms a helical monomeric structure shown by NMR experiments (48). More specifically, hLL-37<sub>17-29</sub> generates an amphipathic helix with a large hydrophobic moment of 0.85 and a net charge of +4 (compared to 0.52 and +6, respectively, of the entire hLL-37, and to 0.56 and +2, respectively, of PSM $\alpha$ 3). hLL-37<sub>17-29</sub> elicited dose-dependent inhibition of Gram-positive *Micrococcus luteus* (*M. luteus*) growth (Fig. S2), with a minimal inhibitory concentration (MIC) (49) of 22  $\mu$ M (Fig. 3). It was also active against the *Staphylococcus hominis* (*S. hominis*) bacterium, with a MIC of 39  $\mu$ M (Fig. S3). We found that hLL-37<sub>17-29</sub> formed long (several micrometers and longer), ribbon-like, fibrils, visualized using transmission electron microscopy (TEM) (Fig. 1A) and cryogenic electron microscopy (CryoEM) (Fig. S4). The CryoEM micrographs showed that the wide (few hundred nanometers) fibrils are composed of lateral association of thinner fibrils (Fig. S4). The wide fibrils also formed in the presence, and interacted with *M. luteus* cells (Fig. 1B).

**Fig. 1. Human and gorilla LL-37<sub>17-29</sub> fibrillar assemblies and interactions with bacteria**

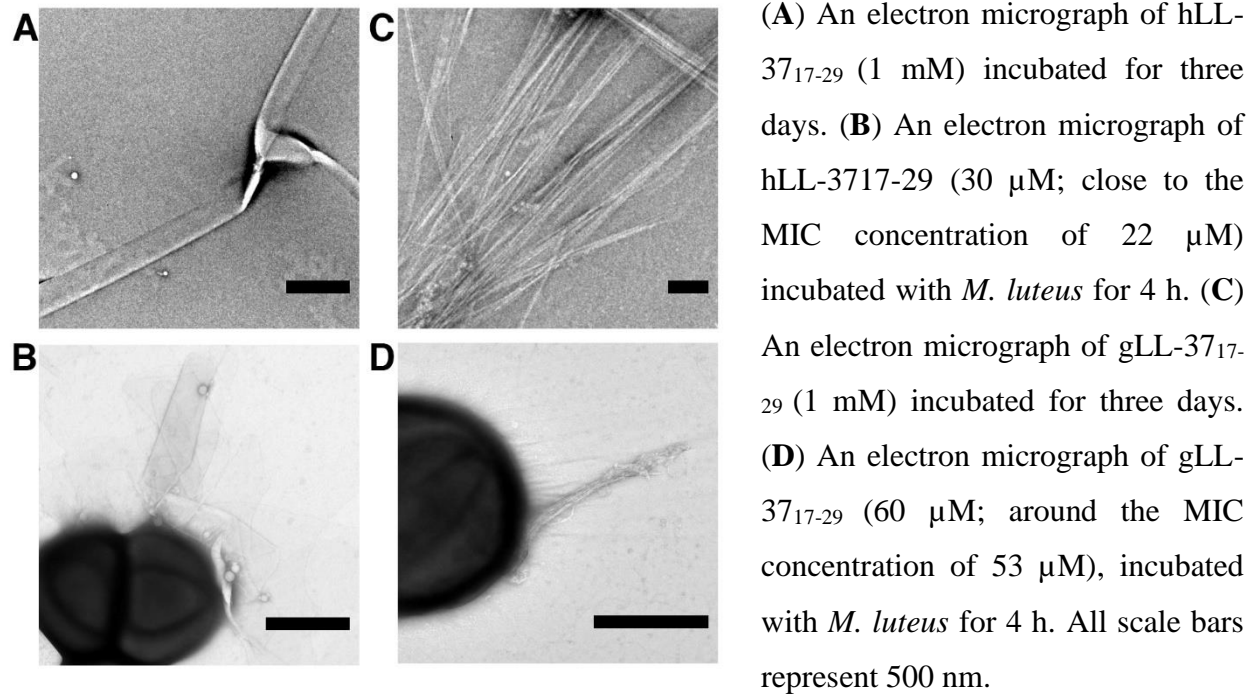

Our determination of the crystal structure of hLL-37<sub>17-29</sub> at 1.35 Å resolution (Table S1), revealed self-assembly of amphipathic helices into a densely packed and elongated hexameric structure forming a central pore (Fig. 2A-C and Movie S1). There were two helices in the asymmetric unit of the crystal, with 67% of their solvent accessible surface areas buried within the assembly, indicating compact packing. For comparison, in the PSMα3 cross-α structure, each helix is 62% buried in the fibril (31). In contrast, structures of full-length LL-37, co-crystallized alone or with different lipids, resulted in different levels of assembly, including monomeric, dimeric, tetramers and fiber-like structure of oligomers (50). When co-crystallized with dodecylphosphocholine (PDB ID 5NNT) (50), full-length LL-37 showed a repetitive architecture of juxtaposed ‘head-to-tail’ amphipathic helices, with interactions mediated by detergent molecules. This structure formed a much looser packing compared to the LL-37<sub>17-29</sub> structure, with only 45% of the helix buried within the protein assembly.

The fibrillar assembly of LL-37<sub>17-29</sub> was comprised of four-helix bundles, stabilized by a hydrophobic core (Fig. 2D&E). Arginine residues are lined on the surface of the bundles, with side chains extending outwards, providing an overall highly positively charged molecular electrical potential surface (Fig. S5). Some of the positively charged residues projecting from the bundle were counteracted by polar interactions with surrounding helices, including potential salt bridges between Asp26 and Arg23/Arg29 from two adjacent helices, and between Lys25 and the C terminal of an adjacent helix (Fig. S6). Due to the symmetry in the structure, each bundle of four helices could form sixteen inter-helical polar interactions with adjacent helices in the assembly (Fig. S6). Phe11, facing away from the hydrophobic core of the bundle towards another Phe11 residue from an adjacent helix, further contributed to the packing between bundles. In addition, Asp26 could potentially form a salt bridge with Arg29 on the same helix. Such intra-helical salt-bridges are associated with increased  $\alpha$ -helical stability (51). The stable helical assembly of LL-37<sub>17-29</sub> corresponded with the thermostability of the fibrils, as visualized by transmission electron microscopy (TEM) after heating to 60°C or 80°C (Fig. S7). However, some disassembly at the edge of the wide fibrils, into thinner fibrils, could be observed after the 80°C heat shock, or after further incubation following the 60°C heat shock (Figs. S7B&C).

The fibrillar assembly in the crystal structure created alternating hydrophobic and polar (positively charged) zigzagged belts on its surface (Fig. S8), suggesting possible interactions with and disruption of negatively charged lipid bilayers, such as bacterial membranes (1, 52-54). Confocal microscopy images of fluorescein isothiocyanate (FITC)-labeled hLL-37<sub>17-29</sub>, which showed antibacterial activity similar to that of the unlabeled peptide (Fig. S9), confirmed aggregation and co-localization of hLL-37<sub>17-29</sub> with bacterial cells (Fig. S10 and Movie S2).

**Fig. 2. The crystal structure of hLL-37<sub>17-29</sub>**

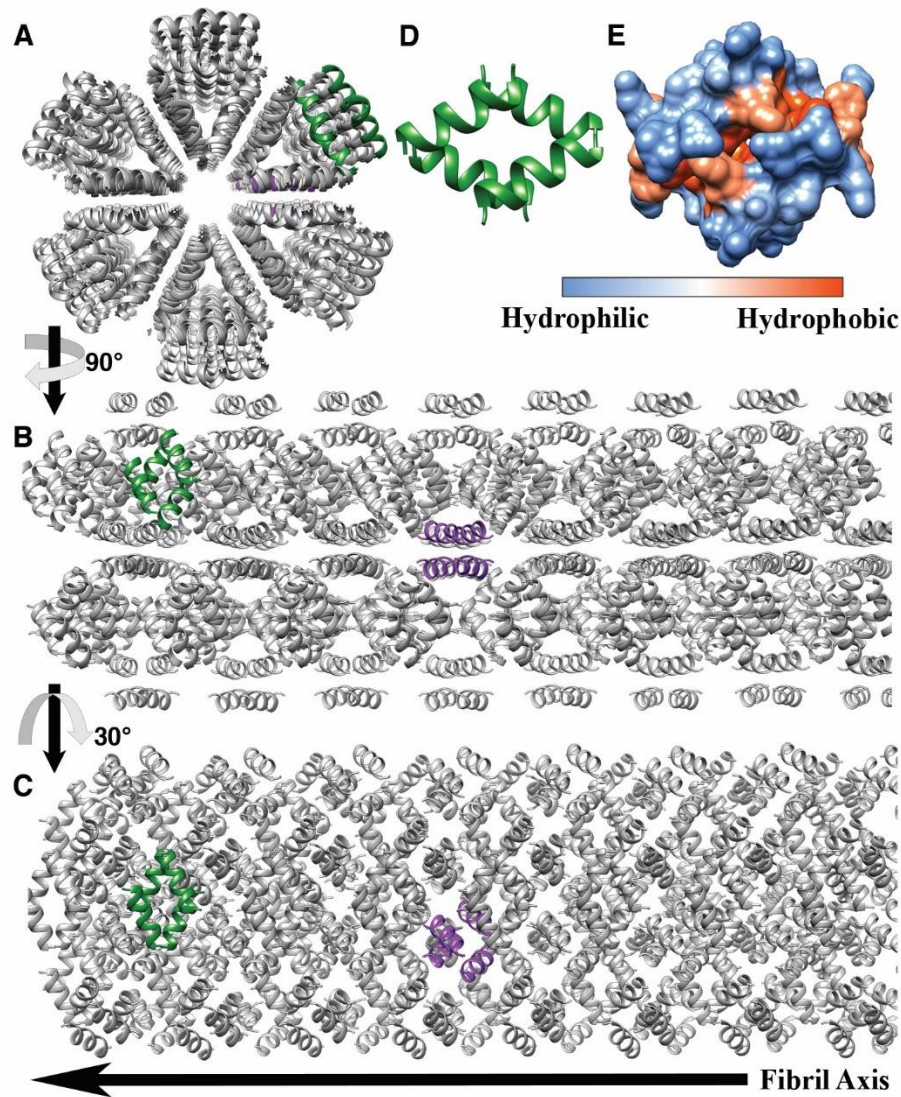

The crystal structure of hLL-37<sub>17-29</sub>, determined at 1.35 Å resolution. The crystal packing shows self-assembly of amphipathic helices into a densely packed, elongated hexameric fibril with a central pore. The fibril is composed of four-helix bundles with a hydrophobic core that associated via a network of polar interaction (Fig. S6). (A) The assembly is shown as grey ribbons, with two representative four-helix bundles colored green and purple to emphasize orientation in the fibril. (B) The view is rotated by 90° in relation to panel A, showing the structure along the fibril axis. (C) The view is rotated by 30° along the fibril axis compared to panel B. (D) An isolated four-helix bundle shown as green ribbons. (E) The four-helix bundle, in the same orientation as in panel D, shown in a surface representation colored by hydrophobicity, according to the scale bar.

The gorilla LL-37 (gLL-37) sequence contains two amino acid substitutions when compared to hLL-37, with one at position 17, the first residue of LL-37<sub>17-29</sub>, substituting phenylalanine with serine (corresponding to a F17S mutation). gLL-37<sub>17-29</sub> exhibited slightly weaker antibacterial activity against *M. luteus* compared to hLL-37<sub>17-29</sub>, with a MIC of 53  $\mu$ M (Fig. 3). This might be related to the reduced amphipathic and hydrophobic nature (with a hydrophobic moment of 0.72 and hydrophobicity of 0.175, compared to 0.85 and 0.315, respectively, of hLL-37<sub>17-29</sub>), or to other the structural properties. The 1.1 Å resolution crystal structures of gLL-37<sub>17-29</sub> displayed a similar assembly compared to hLL-37<sub>17-29</sub> (Table S1 and Fig. S11), with almost identical backbone positions and root-mean-square deviation (RMSD) of 0.15 Å, differing only in the two N-terminal positions that lined the central pore (Figs. S11-S12). In the hLL-37<sub>17-29</sub> structure, the Lys18 side chain was situated almost perpendicular to the cross-section of the pore, while in the gLL-37<sub>17-29</sub> structure, it extended towards the pore, resulting in a more occluded cavity (Fig. S11). We note that the N-terminal residues in both structures were relatively flexible compared to other residues (Fig. S12), deterring from making interpretations of the structural differences regarding activity level. In accordance with the similar assembly in crystals, both hLL-37<sub>17-29</sub> and gLL-37<sub>17-29</sub> formed wide fibrillary structures, as observed by cryogenic electron micrographs (Fig. S4), and made direct contact with *M. luteus* cells (Fig. 1).

The role of the self-assembly in the antibacterial activity of hLL-37<sub>17-29</sub> was examined using single-point mutations designed based on the solved crystal structure. The mutants were tested for antibacterial activity (Fig. 3), and for the formation of ordered aggregates and interactions with bacterial cells, using confocal (Fig. S10) and electron (Fig. S13) microscopy. To design the mutants, each residue in the two helices comprising the asymmetric unit in the hLL-37<sub>17-29</sub> crystal structure was analyzed for the extent of its contacts with surrounding residues in the



assembly, by calculating the solvent accessible surface area (SASA) (55, 56) (Table S2). Alanine substitution of Ile24, the most buried residue within the core of the four-helix bundle (Fig. S14 and Table S2), abolished antibacterial activity against *M. luteus* (Fig. 3) and against *S. hominis* (Fig. S3). This mutation failed to exhibit peptide assembly around bacterial cells (Fig. S13). Correspondingly, confocal microscopy images of the FITC-labeled I24A mutant, which, like the unlabeled peptide, was also ineffective against *M. luteus* (Fig. S9), indicated absence of peptide aggregation (Fig. S10). Likewise, the I24S, I24K, I24Q and I24D mutations all abolished antibacterial activity against *M. luteus* (Fig. 3), and confocal microscopy images of the FITC-labeled I24S inactive mutant (Fig. S9) showed no detectable aggregation (Fig. S10). Similarly, Phe27 was significantly buried within the fibrillar assembly (Table S2), forming contacts with residues on the four-helix bundle and with other helices in the fibrillar assembly (Fig. S14). The F27A mutation abolished antibacterial activity against *M. luteus* (Fig. 3) and failed to aggregate when incubated with the bacteria (Fig. S13). In contrast to the buried Ile24 and Phe27, Gln22 was the least buried residue in the assembly, facing outward from the core of the four-helix bundle, and forming minimal contacts within adjacent helices (Fig. S14 and Table S2). Consequently, the Q22A mutation resulted in minimal change in activity against *M. luteus* (MIC=33  $\mu$ M; Fig. 3) and was also active against *S. hominis*, with a MIC of 53  $\mu$ M (Fig. S3). Electron micrographs of the Q22A mutant showed large fibrous nano-structures contacting the bacterial cells (Fig. S13). Correspondingly, confocal microscopy images of the FITC-labeled Q22A, which was slightly less active than the unlabeled Q22A peptide (Fig S9), formed aggregates which co-localized with the bacterial cells (Fig. S10). Overall, the mutagenesis analyses indicated the importance of hLL-37<sub>17-29</sub> self-assembly in its antibacterial activity and supported a plausible active fibril arrangement.

Investigation of the N-terminal residues which are not buried within the assembly (Table S2) but which face the central pore, showed that the F17A and K18A mutants display a similar ~3-fold reduction in antibacterial activity against *M. luteus*, with a MIC of 60  $\mu$ M (Fig. 3). Maintaining the positive charge via a K18R substitution, showed a very similar MIC to that of hLL-37<sub>17-29</sub>, while the K18H substitution showed slightly reduced activity (Fig. 3). In contrast, substitution to the polar but uncharged glutamine (K18Q) fully abolished activity (Fig. 3). The results suggest that the two residues facing the pore are important for activity, with the positive charge of Lys18 being the critical determinant. We therefore cannot conclude about the specific role of the central pore in activity, as the effect of substitutions might be related to the reduced positive charge (54, 57, 58) regardless of its structural location.

To conclude, the atomic structures of human and primate antibacterial peptide derivatives showed a fibrillar assembly of densely packed amphipathic helices. The structures of LL-37<sub>17-29</sub> lacked amyloid continuous sheets with individual molecules stacked perpendicular to the fibril axis, and correspondingly did not bind the amyloid indicator dye Thioflavin T, in contrast to the cross- $\alpha$  amyloid fibrils of PSM $\alpha$ 3 (31) (Fig. S15). LL-37<sub>17-29</sub> presents a type of self-assembly which, to the best of our knowledge, is distinct from other protein fibrils, with a role in direct killing of bacterial cells still to be fully determined. Mutagenesis analyses, designed in accordance with the crystal structure, supported the role of self-assembly and of this particular structure in anti-bacterial activity and in direct interactions with bacterial cells. Links between fibril formation and antimicrobial activity are accumulating (3-8, 11-19, 59, 60), and here, we provide atomic-level insight. Further elucidation of the interplay between antimicrobial activity and fibril formation and morphology will aid the design of AMPs with enhanced potency, selectivity, stability, bioavailability and shelf-life. Moreover, under specific conditions, tunable self-assembly of AMPs

might provide another layer of control over antimicrobial activity, in the form of antibacterial therapeutics or coating of medical devices, and will may target other roles of AMPs in immunomodulation and in killing cancerous cells (61, 62).

**Fig. 3. The effect of LL-37<sub>17-29</sub> and its mutants on *M. luteus***

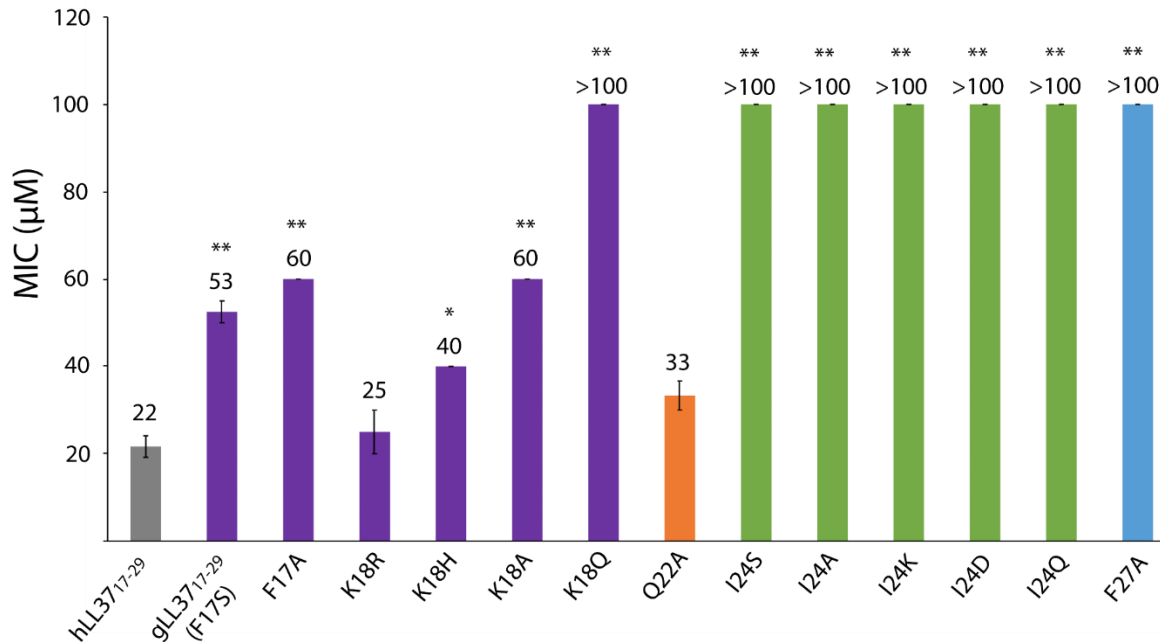

hLL-37<sub>17-29</sub> and some single-point mutants were incubated with *M. luteus* for 24h at a range of concentrations up to 100 μM, and bacterial growth rate was measured by optical density. From the resulting growth curves, the area under the curve (AUC) was calculated (63). MIC values were defined as the minimal concentration of the peptide which yielded less than 20% of the AUC of the control (bacteria with no added peptides). Mean MIC values are presented above the bars. The MIC of hLL-37<sub>17-29</sub> is shown by a grey bar. Mutations in residues lining the central pore (Phe17 and Lys18), are shown by purple bars. A mutation in a residue showing minimal contacts with other residues within the fibrillar assembly (Gln22), is shown by an orange bar. Mutations in a residue fully buried in the four-helix bundle (Ile24), are shown by green bars. A mutation in a buried residue (Phe27), contacting other residues within the four-helix bundle and on surrounding helices in the fibrillar assembly, is shown by a blue bar. The experiments were performed at least three times, each on a different day. Error bars indicate the standard error calculated between all measures. A t-test for two-sample assuming equal variances was performed, \* indicates  $p < 5 \times 10^{-3}$  and \*\* indicates  $p < 5 \times 10^{-5}$ , compared to hLL-37<sub>17-29</sub>.

## Acknowledgments

We are grateful for Duilio Cascio (University of California Los Angeles) for advice and help with crystal structure determination. We thank Einat Netzer for help in conducting experiments and to Carolin Seuring for advice on microscopy images. We acknowledge guidance and technical support provided by Yael Pazy-Benhar and Dikla Hiya at the Technion Center for Structural Biology (TCSB), Na'ama Koifman and Ellina Kesselman from the Russell Berrie Electron Microscopy Center of Soft Matter, Yael Lupo-Haber and Nitsan Dahan from the Life Science and Engineering Infrastructure Center, all at the Technion, Israel. This research was supported by Israel Science Foundation (grant no. 560/16), Israel Ministry of Science, Technology & Space (grant no. 78567), BioStruct-X, funded by FP7, and the iNEXT consortium of Instruct-ERIC. The synchrotron MX data collection experiments were performed at beamlines ID23-EH2 at the European Synchrotron Radiation Facility (ESRF), Grenoble, France, and at beamline P14, operated by EMBL Hamburg at the PETRA III storage ring (DESY, Hamburg, Germany). We are grateful to the teams at ESRF and EMBL Hamburg. We would like to thank Thomas R. Schneider and Gleb Bourenkov for their assistance in operating the P14 beamline.

## Supplementary Materials

### Materials and Methods

#### Peptides and reagents

LL37<sub>17-29</sub> sequences are derivatives of the human and gorilla cathelicidin antimicrobial peptides CAMP (UniProt IDs P49913 and Q1KLY3, respectively). hLL37<sub>17-29</sub>, gLL37<sub>17-29</sub>, their mutants, fluorescein isothiocyanate (FITC)-labeled peptides, and *Staphylococcus aureus* PSM $\alpha$ 3 (UniProt ID H9BRQ7) were purchased from GL Biochem (Shanghai) Ltd. as lyophilized peptides, at >98% purity. Thioflavin T (ThT) was purchased from Sigma-Aldrich. Ultra-pure double distilled water (UPddw) were purchased from Biological Industries. Additional reagents and consumable are mentioned below.

Peptide sequences:

LL37: LLGDFFRKSKEKIGKE**FKRIVQRIKDFLR**NLVPRTES

hLL37<sub>17-29</sub>: FKRIVQRIKDFLR

gLL37<sub>17-29</sub> (F17S): SKRIVQRIKDFLR

FITC-N- hLL37<sub>17-29</sub>: FITC-FKRIVQRIKDFLR

hLL37<sub>17-29</sub> F17A: AKRIVQRIKDFLR

hLL37<sub>17-29</sub> K18R: FRRIVQRIKDFLR

hLL37<sub>17-29</sub> K18Q: FQRIVQRIKDFLR

hLL37<sub>17-29</sub> K18H: FHRIVQRIKDFLR

hLL37<sub>17-29</sub> K18A: FARIVQRIKDFLR

hLL37<sub>17-29</sub> Q22A: FKRIVARIKDFLR

FITC-N- Q22A: FITC- FKRIVARIKDFLR

hLL37<sub>17-29</sub> I24A: FKRIVQRAKDFLR

FITC-N- I24A: FITC-FKRIVQRAKDFLR

hLL37<sub>17-29</sub> I24S: FKRIVQRSKDFLR

FITC-N- I24S: FITC-FKRIVQRSKDFLR

hLL37<sub>17-29</sub> I24K: FKRIVQRKKDFLR

hLL37<sub>17-29</sub> I24Q: FKRIVQRQKDFLR

hLL37<sub>17-29</sub> I24D: FKRIVQRDKDFLR

hLL37<sub>17-29</sub> F27A: FKRIVQRIKDALR

FITC-N- F27A: FITC- FKRIVQRIKDALR

### Bacterial strains and culture media

*Micrococcus luteus* (*M. luteus*, an environmental isolate) was a kind gift from Prof. Charles Greenblatt from the Hebrew University of Jerusalem, Israel. An inoculum was grown in Luria-Bertani medium (LB), at 30 °C, 220 rpm shaking, 16 h (35). *Staphylococcus hominis* (subsp. *hominis* Kloos and Schleifer *S. hominis*) was purchased from ATCC (ATCC® 27844™). An inoculum was grown in brain-heart infusion media (BHI), at 37°C, 220 rpm shaking, 16 h.

### Determination of minimal inhibitory concentrations (MICs)

*M. luteus* from a 24 h inoculum, were grown in LB (30°C, 220 rpm shaking, overnight). *S. hominis* was grown in BHI medium (37 °C, 220 rpm shaking, overnight). MIC experiments against *M. luteus* and *S. hominis* were performed in a similar fashion except from the growth conditions. LL37<sub>17-29</sub> and mutants were dissolved in PBS, and FITC-labeled peptides were dissolved in UPddw. The peptide stock solutions were then serially diluted into the bacterial media. Control and blank samples contained everything but peptides or everything but bacteria, respectively. Experiments were performed in a sterile 96-well plate. Bacterial growth (OD<sub>595</sub>) was measured during a 24 h incubation, at 30°C, with 220 rpm shaking, by a plate reader (FLUOstar omega or CLARIOstar, BMG LABTECH). Appropriate blanks were subtracted, and the mean values were plotted against peptide concentration. From the resulting growth curves, the area under the curve (AUC) was calculated (63). MIC values were defined as the minimal concentration of the peptide which yielded less than 20% of the AUC of the control (bacteria with no added peptides). All experiments were performed in triplicates, and the entire experiment was repeated on at least three different days, from which values were averaged. Error bars represent standard errors of the mean. Two-tailed unpaired t-tests were performed to compare the mean MIC values of tested mutant peptides or derivatives to that of LL37<sub>17-29</sub>.

### Confocal microscopy imaging of peptides interacting with bacteria

*M. luteus* were grown, for 16 h, in LB and diluted to an OD<sub>600</sub>=0.1. FITC-labeled peptides were dissolved in UPddw, sonicated for 3 min, and then added to the bacteria suspension to a final concentration of 30-150 µM (as indicated in the relevant figure); final reaction volume was 100 µl. Control samples contained everything but the peptide or everything but the bacterium. All samples were incubated, in the dark, at 30°C, with shaking at 220 rpm, for 4 h. Thereafter, 1 ml

paraformaldehyde 4% (w/v in PBS) was placed over the samples, for 15 min, at room temperature, in the dark. After fixation, samples were washed three times with fresh PBS, and then treated with Hoechst 33342 (10 mg/ml). All samples were applied to  $\mu$ -Slides VI 0.4 slides (Ibidi, 80666). Confocal images were acquired using an inverted confocal laser-scanning microscope LSM 710 (Zeiss) equipped with a C-Apochromat 40x water immersion objective lens (NA 1.2) and a Definite Focus unit in an environmental chamber set at 37°C. The laser wavelengths for excitation were 405 nm (Hoechst) and 488 nm (FITC). Brightfield images were collected from the 405 nm laser. Emission was collected sequentially at 410-497 nm for Hoechst and at 493-797 nm for FITC. The pinhole was set for 1  $\mu$ m. Image processing was done with the Fiji software.

*Time-lapse imaging:* *M. luteus* bacteria from inoculum were diluted to OD<sub>600</sub> = 0.1 in LB. Hoechst 33342 (10 mg/ml) was added to bacteria suspension and incubated in the dark, for 10 min, at room temperature. Just before imaging, FITC-LL37<sub>17-29</sub> was added to the suspensions, to a final concentration of 30  $\mu$ M. The samples were applied to  $\mu$ -Slides VI 0.4 slides. Images with a digital resolution of 2048x2048 pixels and 16-bit depth were acquired every 10 min, at room temperature, using a Zeiss LSM 710 confocal microscope. Images were then used to construct a movie using Fiji software. A Gaussian filter ( $\sigma=2.0$ ) was applied to the FITC channel for noise removal and brightness and contrast of the images were adjusted (64-66).

#### Thioflavin T (ThT) fluorescence kinetic assay

ThT powder was dissolved in UPddw to a stock solution of 2 mM, vortexed and filtered twice through a 0.22  $\mu$ m syringe-driven filter unit. Lyophilized PSM $\alpha$ 3 peptide was pre-treated as previously described (31): PSM $\alpha$ 3 was dissolved to 1 mg/ml in trifluoroacetic acid (TFA) and hexafluoroisopropanol (HFIP, 1:1v/v), sonicated for 3 min in a sonication bath and left to air-dry in a chemical hood. Dried samples were stored at -20°C. Just before the experiment, PSM $\alpha$ 3 was dissolved to 1 mM in UPddw, sonicated for 3 min and immediately transferred to ice. Thereafter, it was diluted with reaction buffer (200  $\mu$ M ThT, 10 mM sodium phosphate buffer, pH=8, and sodium chloride 150 mM), centrifuged at 12,500 rpm, for 10 min, in a pre-chilled centrifuge (4°C). Lyophilized LL37<sub>17-29</sub> peptide was dissolved in an identical reaction buffer to 1 mM. Blank solutions contained everything but the peptides. The reaction was carried out in a Greiner Bio-One black 96-well flat-bottom plate, immediately covered with a silicone sealing film (ThermalSeal RTS), and incubated in a plate reader (CLARIOstar or FLUOstar omega, BMG LABTECH) at

25°C, with 220 rpm shaking for 20 sec before each measurement. ThT fluorescence (excitation:438±20 nm; emission: 490±20 nm), was collected for at least 72 h (only 24 h are presented). All measurements were performed in triplicates and the entire experiment was repeated on at least three different days. Readings of blank solutions were subtracted. Error bars represent standard errors of the means.

### Transmission electron microscopy (TEM)

Lyophilized LL37<sub>17-29</sub> was dissolved in UPddw to a concentration of 1-5 mM and incubated, at 37°C, for several days, as indicated in the individual Figures.

*Imaging the peptides in the presence of bacterial cells:* *M. luteus* was grown for 24 h in LB. Approximately  $1.5 \times 10^9$  bacteria cells were washed three times with 10 mM potassium phosphate buffer at pH=7.4. Peptides (LL37<sub>17-29</sub> and its mutants) were dissolved in this same buffer and added to the bacterial pellets, which were re-suspended to a final peptide concentration of 30-150 µM (as detailed in the relevant figures). Samples were then incubated, at 30°C, with 220 rpm shaking, for 4 h.

*Fibril thermostability:* Lyophilized hLL37<sub>17-29</sub> was dissolved to 2 mM in UPddw and incubated at 37 °C for 3 days. After incubation, samples were moved to a heat block, pre-warmed to 60°C or 80°C (as indicated in the relevant figure), for 10 min. TEM samples were fixed on the EM grid directly from the heat block. The sample heated to 60°C was further incubated at 37°C for 24h and then fixed on the grid.

*TEM grid preparation and visualization:* Samples (4-5 µl) were applied directly onto glow-discharged (easiGlow; Pelco, Clovis, CA, USA, 15 mA current; negative charge; 25 s time) 400 mesh copper grids, with a grid hole size of 42 µm, stabilized with Formvar/carbon (Ted Pella, Inc.) and allowed to adhere for 60 sec. Samples were than stained with 1% uranyl acetate solution (Electron Microscopy Science, 22400-1) for 60 sec, before being blotted with Whatman filter paper. Specimens were examined with a FEI Tecnai T12 G2 electron microscope, at an accelerating voltage of 120 kV, or a FEI Tecnai G2 T20 electron microscope, at an accelerating voltage of 200 kV.



### Cryogenic electron microscopy (cryo-EM)

Lyophilized human and gorilla LL37<sub>17-29</sub> were dissolved in UPddw to 1-5 mM and incubated for 3-10 days (as indicated in the relevant figures), at 37°C. Another sample was prepared from 2 mM hLL37<sub>17-29</sub> dissolved in 2.7 mM sodium dodecyl sulfate (SDS) (diluted in UPddw from a 40% stock). Of note, 2.7 mM SDS is at sub critical micelle concentration (CMC). Within a temperature-controlled chamber at 100% relative humidity, 3 µl of each sample were applied to a perforated carbon film supported by an electron microscope grid, which were pre-discharged, as described above. After 3 sec, the drop was blotted by Whatman filter paper and liquids were vitrified through rapid plunging of the grids into liquid ethane at its freezing point (67). Specimens were examined under a FEI Talos 200C high-resolution electron microscope, at an accelerating voltage of 200 kV, using a Gatan 626 cryo-holder. To minimize electron beam radiation damage, the low-dose imaging mode was used. Images were collected digitally by a FEI Falcon III direct-imaging camera and the TIA software, with the help of the “phase plates” (FEI), to enhance image contrast (68, 69).

### Crystallization conditions

Lyophilized human and gorilla LL37<sub>17-29</sub> peptides were dissolved to 10 mM (17 mg/ml) in double distilled water, vortexed and centrifuged at 14,000 rpm, 4°C, for 10 min. hLL37<sub>17-29</sub> crystals were grown in a reservoir solution containing 0.2 M sodium acetate, 0.1 M Tris, pH 8.5, and 30% (w/v) polyethylene glycol 4000. gLL37<sub>17-29</sub> crystals were grown in a reservoir solution containing 0.1 M HEPES, pH=7.5, and 1.4 M sodium citrate. The crystals were grown at 20°C, using the hanging-drop vapor diffusion technique. gLL37<sub>17-29</sub> crystals were soaked in cryo-protectant solution which contained reservoir solution, 5% (v/v) 2-methyl-2,4-pentanediol (MPD) and 20% glycerol. Crystals were flash-frozen in liquid nitrogen before X-ray data collection.

### Structure determination and refinement

X-ray diffraction of gLL37<sub>17-29</sub> was collected at the ID23-EH2 micro-focus beamline at the European Synchrotron Radiation Facility (ESRF). The wavelength of data collection was 0.873Å. X-ray diffraction of hLL37<sub>17-29</sub> was collected at the EMBL micro-focused beam P14, at the high brilliance 3rd Generation Synchrotron Radiation Source at DESY: PETRA III, Hamburg, Germany. The wavelength of data collection was 0.976Å. Data indexing, integrating and scaling

were performed using XDS and XSCALE (70). Phases were obtained by molecular replacement using Phaser (71). For the molecular replacement of gLL37<sub>17-29</sub>, a 13-residue poly-alanine idealized helix was used as the search model. For the molecular replacement of hLL37<sub>17-29</sub>, the structure of gLL37<sub>17-29</sub> was used as the search model. Crystallographic refinements were performed with Refmac5 (72). Further model building was performed using Coot (73) and illustrated with Chimera which was also used to yield a structural movie (74). The structures of human and gorilla LL37<sub>17-29</sub> were determined at 1.35 Å and 1.1 Å resolution, respectively. In both structures, there were two peptide chains in the asymmetric unit and water molecules. There were no residues detected in the disallowed region at the Ramachandran plot. Crystallographic statistics are presented in Table S1.

#### Sequence alignments and proteolytic digestion prediction

Sequence alignment between LL37<sub>17-29</sub> and PSM $\alpha$ 3 was performed using the MAFFT server (75). Amino acids are colored by their physicochemical properties (76). Proteolytic digestion sites in the human LL37 were predicted using the ExPASy's PeptideCutter Tool (77).

#### Calculations of structural properties

The electrostatic potential map, hydrophobicity and B factor scales presented in the figures were created using Chimera (74). The values of the hydrophobicity scale were according to Kyte and Doolittle (78). The electrostatic potential was calculated using APBS-PDB2PQR (79). Helix amphipathicity and the hydrophobic moment were calculated with HeliQuest (80).

#### Solvent-accessible surface area calculations

Solvent-accessible surface areas (SASAs) were calculated using AREAIMOL, with a probe radius of 1.4Å (81, 82), via the CCP4 package (72). The solvent-accessible buried surface area of each chain in the asymmetric unit was calculated as the area difference between the isolated chain and the chain within the fibril assembly, and is presented as the percentage of the total SASA of the chain. The SASA per residue within different isolated helical assemblies are presented in Table S2.

**Figure S1. Sequence alignment of human LL-37 and bacterial PSM $\alpha$ 3**

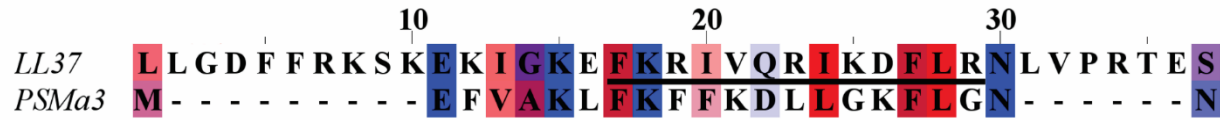

Sequence alignment between human LL-37 (UniProt ID P49913) and *S. aureus* PSM $\alpha$ 3 (UniProt ID H9BRQ7). Amino acids are color-coded by their physicochemical properties (76). Identity and similarity between the two sequences were 19% and 24%, respectively. The hLL-37<sub>17-29</sub> segment within the full sequence of hLL-37 is underlined and constitutes the most conserved region between the two peptides, with 31% identity and 39% similarity to the equivalent segment in PSM $\alpha$ 3.

**Figure S2. Human LL-37<sub>17-29</sub> concentration-dependent inhibition of *M. luteus* growth**

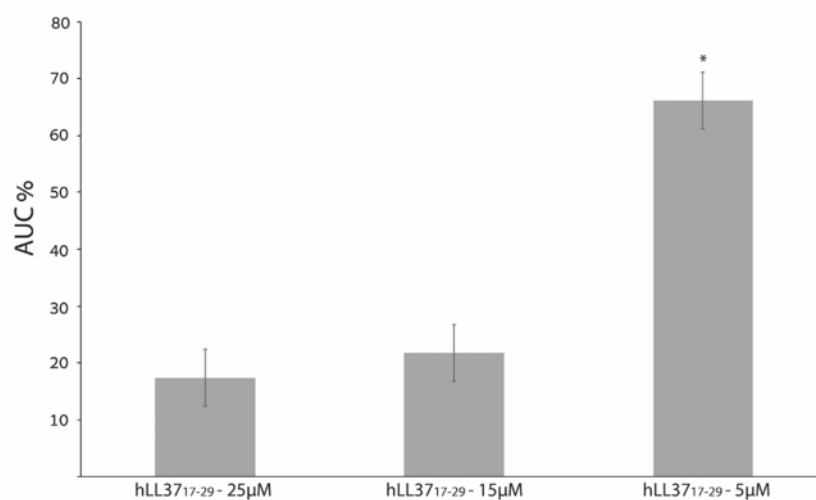

Bacterial growth over 24h is presented as percentage of control (peptide-free samples) integrated area under the curve (AUC). All experiments were performed in triplicates, which were averaged. Error bars represent the standard deviation of the mean divided by the root of the number of repeats. For significance, a paired two-sample t-test, assuming equal variances, was performed; \*indicates  $p < 5 \times 10^{-5}$  compared to hLL-37<sub>17-29</sub> 25µM. The experiments were performed at least three times, on different days.

### Figure S3. Inhibition of *S. hominis* growth by different hLL-37<sub>17-29</sub> mutants and FITC-conjugates

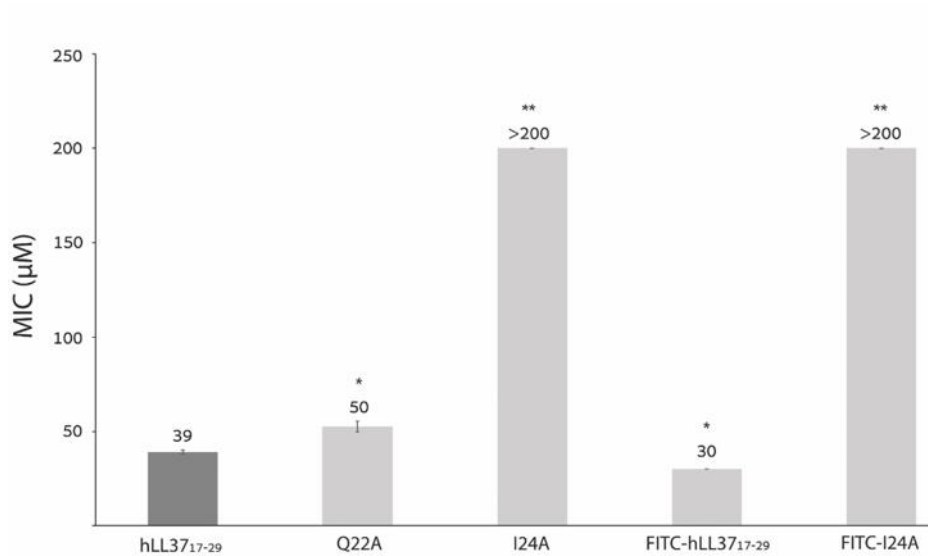

Growth inhibition of *S. hominis* by different hLL-37<sub>17-29</sub> mutants and FITC-conjugates, as expressed by the MIC values indicated above the bars. The highest tested concentration of the peptides was 200 µM. All experiments were performed in triplicates, which were averaged. Error bars represent the standard deviation of the mean divided by the root of the number of repeats. A paired, two-sample Student's t-test, assuming equal variances, was performed; \* indicates  $p < 0.001$ , \*\* indicates  $p < 5 \times 10^{-10}$  compared to hLL-37<sub>17-29</sub>. Experiments were performed at least three times, on different days.

**Figure S4. Cryo-electron micrographs of human and gorilla LL-37<sub>17-29</sub>**

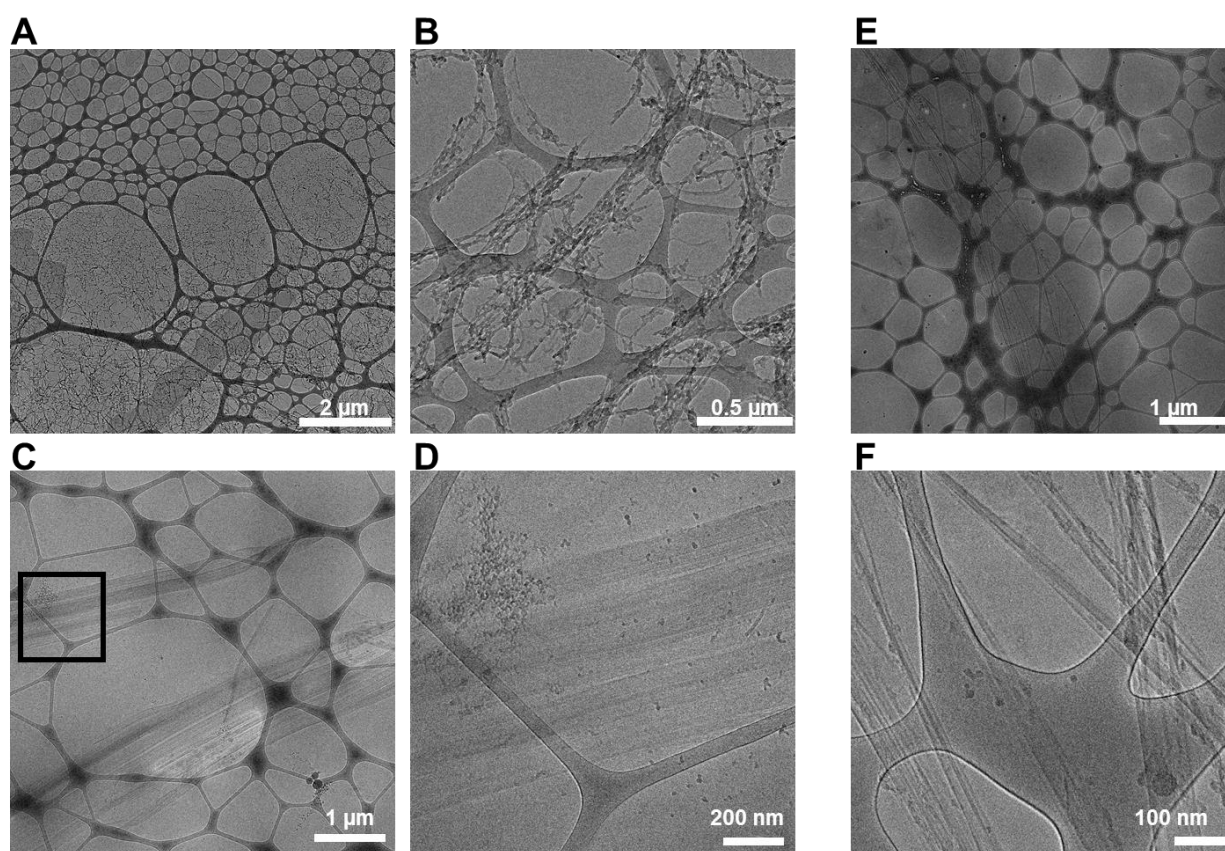

Cryogenic electron micrographs of human (A-D) and gorilla (E-F) LL-37<sub>17-29</sub>. (A-B) Micrographs at two different magnifications show massive fibrillation of 5 mM hLL-37<sub>17-29</sub>, after incubation at 37 °C, for three days. (C-D) hLL-37<sub>17-29</sub> (2 mM) was incubated with 2.7 mM SDS for 10 days, at 37 °C. The image in panel D is a zoom-in view of the boxed image in panel C. The micrographs display the formation of straight fibrils that bundle to form several hundred nanometer-wide ribbons, similar to what was observed in the negative-staining TEM images (Fig. 1). (E-F) Micrographs of 1 mM gLL-37<sub>17-29</sub>, incubated for three days, at 37 °C, show the formation of very long (several micrometers) and straight fibrils that also bundle into wide ribbon-like fibrils.

**Figure S5. Positively charged electrostatic surface of the four-helix bundle of hLL-37<sub>17-29</sub>**

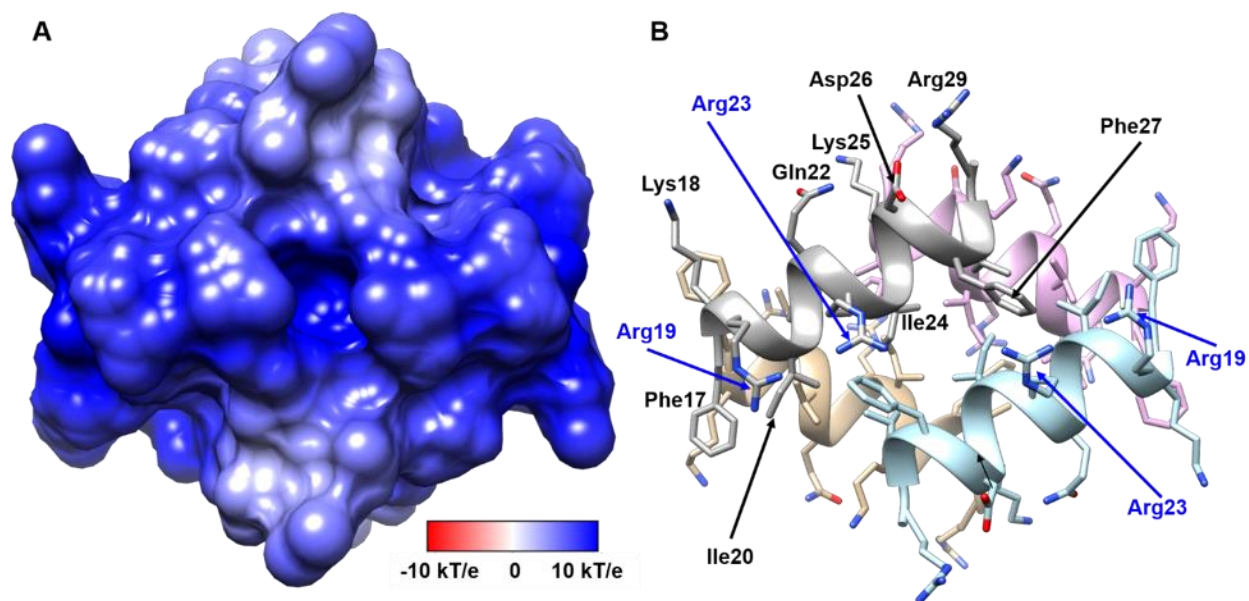

(A) A projection of the electrostatic potential ( $\phi$ ) onto the molecular surface of the four-helix bundle of hLL-37<sub>17-29</sub>; the scale bar indicates  $\phi$  ranges between  $-10$  kT/e (dark red) and  $10$  kT/e (dark blue). (B) The bundle is displayed as ribbons, in the same orientation as in panel A, with side chains shown as sticks. The ribbons and carbons of each of the four helices are colored differently (grey, light blue, tan and pink) and non-carbon atoms are colored by atom type (oxygen in red and nitrogen in blue). Residues are labeled. Arg19 and Arg23 (labeled blue) from two helices lie across each side of the bundle.

**Figure S6. Interfaces of the four-helix bundle with surrounding helices in the fibril assembly**

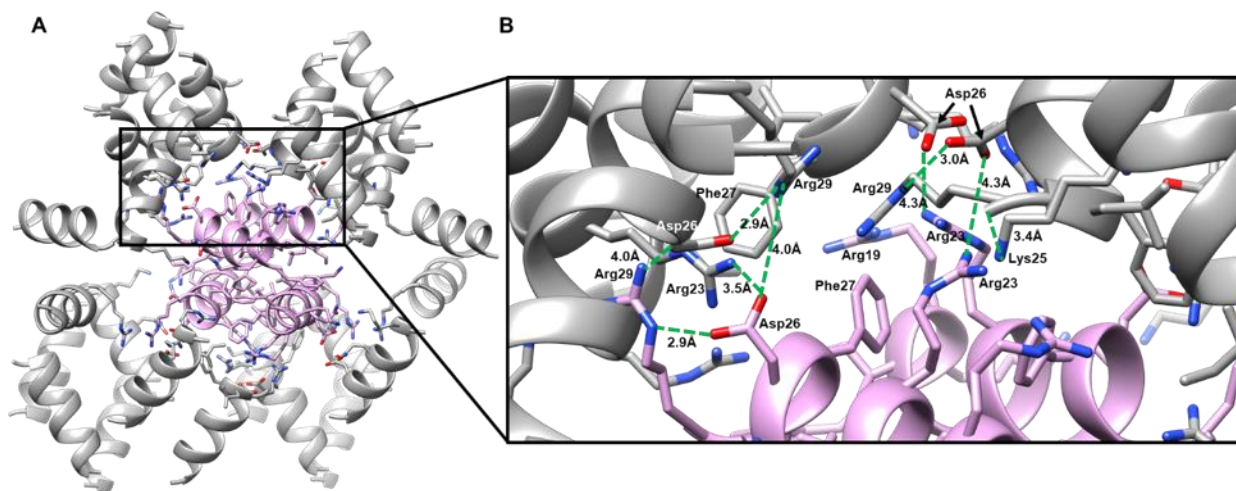

(A) One representative four-helix bundle is shown by pink ribbons, and surrounding helices are colored grey. Side chains of the “pink” bundle and residues of surrounding helices which contact the bundle are shown as sticks, colored by atom type (oxygen in red and nitrogen in blue). The asymmetric unit of the crystal contains two chains which are almost identical (RMSD of 0.13 Å), thus, the bundle shows almost four identical interfaces. (B) A zoom-in view. Potential polar interactions are displayed, and distances between residues are indicated: Asp26 can form inter-helical electrostatic interactions with Arg23, and with Arg29 from a different helix, and intra-helical electrostatic interactions with Arg29. In addition, Lys25 can form electrostatic interactions with the negatively charged C-terminus of an adjacent helix. Overall, each helix shows four inter-helical and one intra-helical electrostatic interactions. In addition, Phe27 faces the middle of the interface, contributing to hydrophobic packing.



### Figure S7. Thermostability of hLL-37<sub>17-29</sub> fibrils

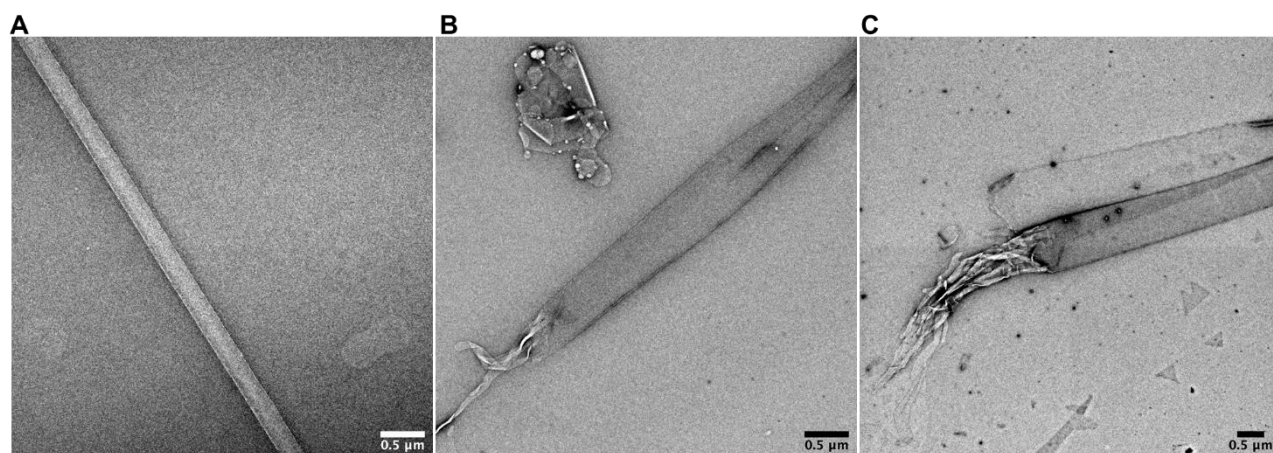

Transmission electron micrographs of 2mM LL-37<sub>17-29</sub> incubated for 3 days. The sample was heated to 60°C for 10 min (**A**), for additional 24hr at 37°C after the 60°C heat shock (**B**), or heated to 80°C for 10 min (**C**).

**Figure S8. The surface of the LL-37<sub>17-29</sub> fibril shows alternating hydrophobic and polar zigzagged belts**

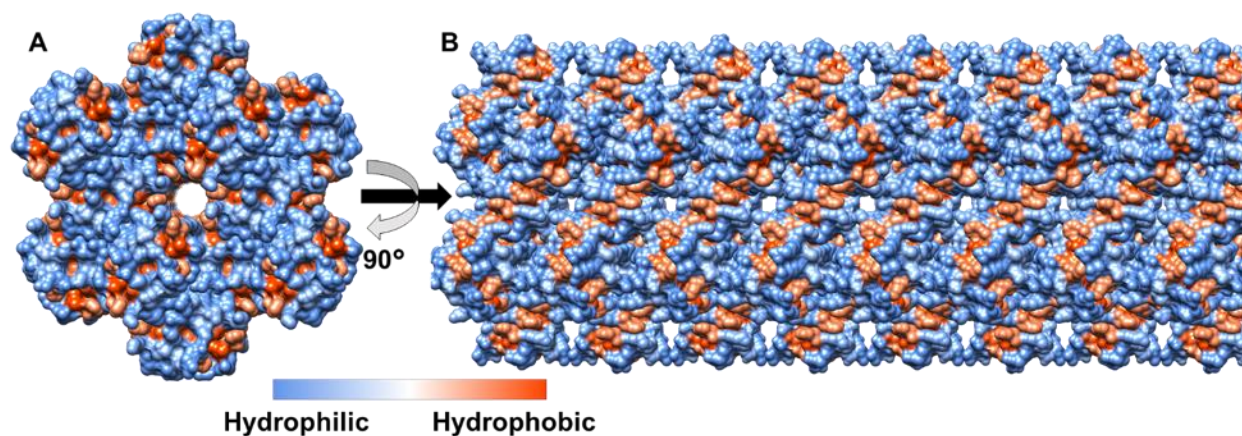

The hexameric fibrillar structure of hLL-37<sub>17-29</sub> is shown in a surface representation, colored by hydrophobicity, according to the scale bar. **(A)** A view into the fibril axis. **(B)** A view along the fibril axis. The surface of the fibril shows zigzagged belts of alternating hydrophobic and polar (positively charged) patches.

**Figure S9. Growth inhibition of *M. luteus* by FITC-labeled LL-37<sub>17-29</sub> derivatives**

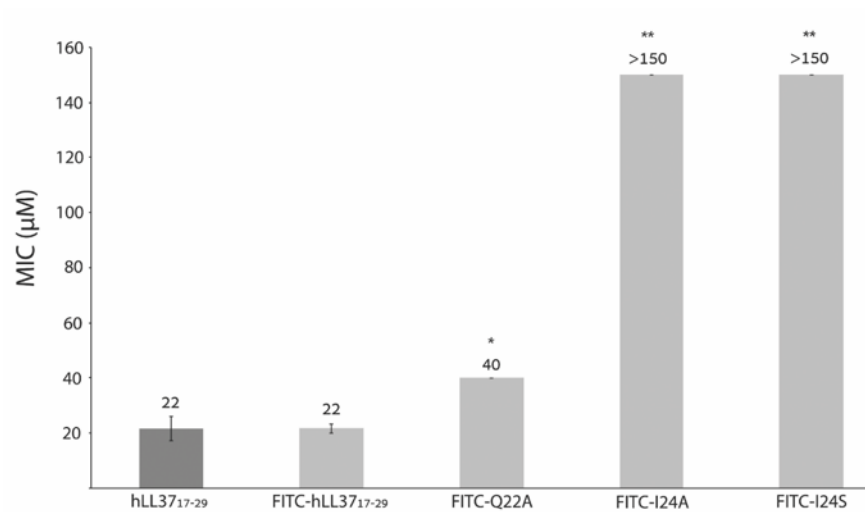

Growth inhibition of *M. luteus* by FITC-hLL-37<sub>17-29</sub> and its mutants is displayed as mean MIC values provided above the bars. The highest tested concentration of the peptides was 150 µM. Each measurement was performed in triplicates and repeated at least three times, on different days. The error represents the standard deviation of the mean divided by the root of the number of repeats. A paired, two-sample Student's t-test assuming equal variances was performed; \* indicates  $p < 5 \times 10^{-3}$  and \*\* indicates  $p < 5 \times 10^{-7}$  compared to hLL-37<sub>17-29</sub>.

**Figure S10. Confocal microscopy images of *M. luteus* incubated with FITC-LL-37<sub>17-29</sub> and its mutants**

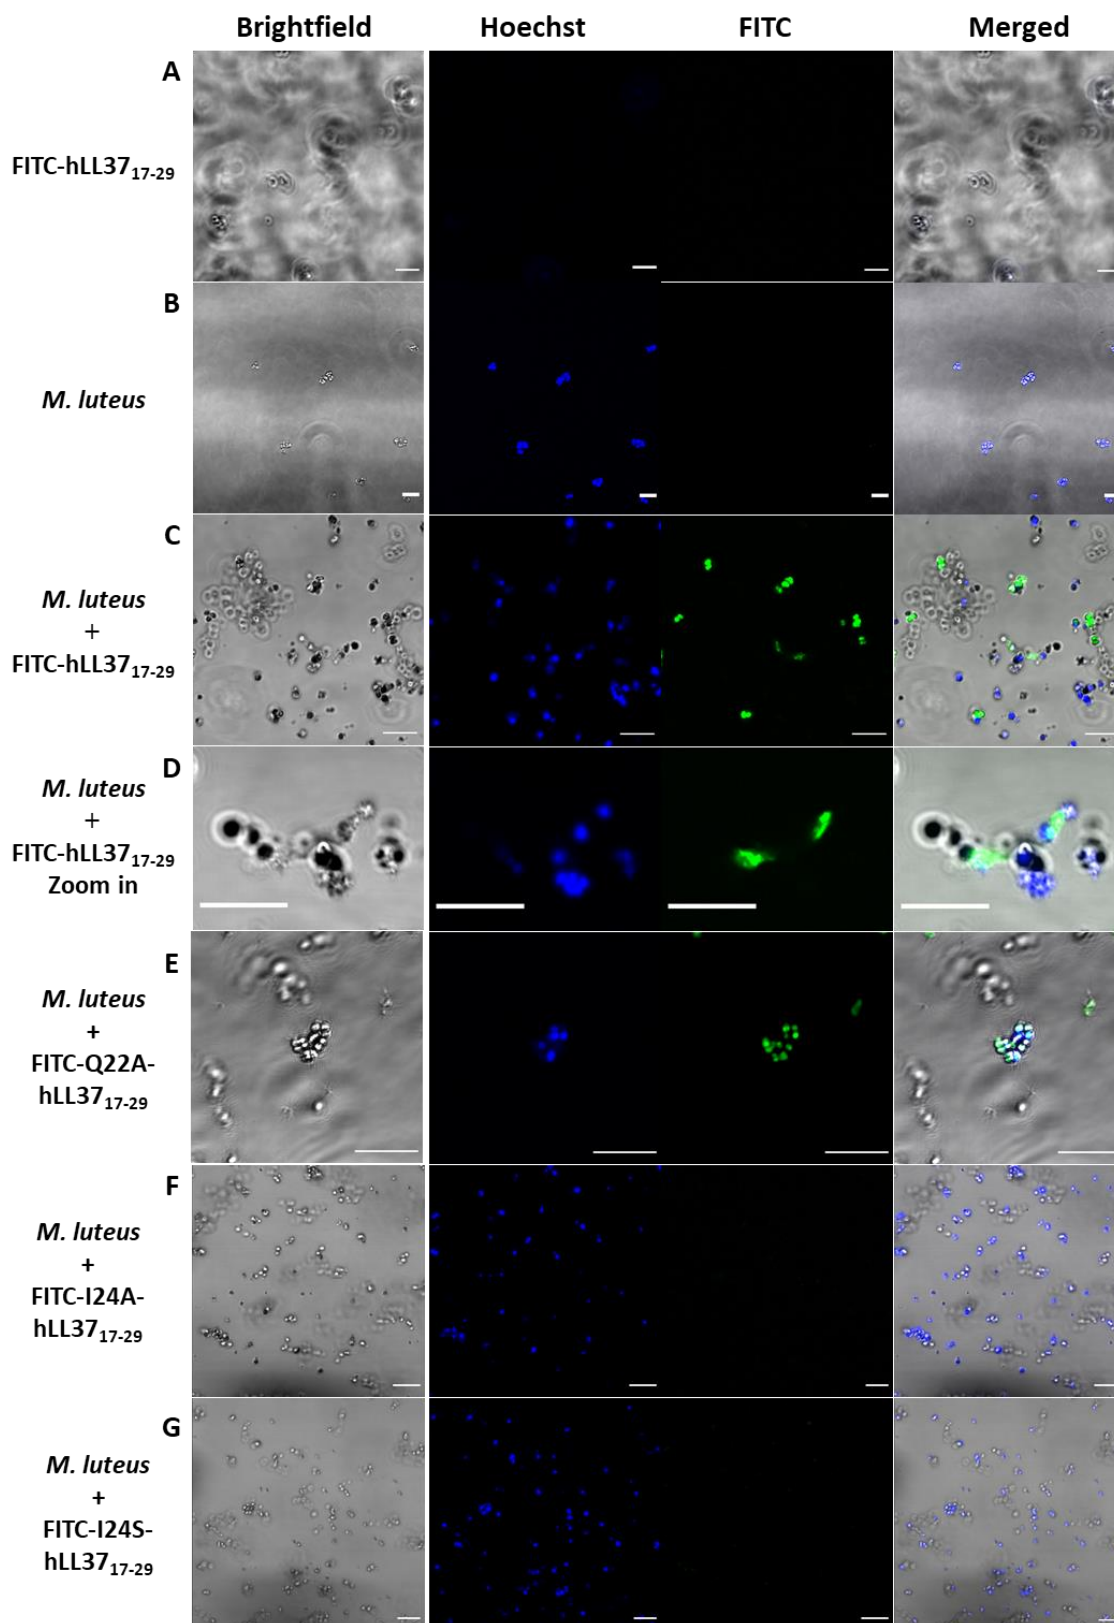

Representative confocal microscopy images of *M. luteus* incubated for 4 h with FITC-labeled LL-37<sub>17-29</sub> or mutants. The FITC channel was merged with the bright-field channel to show peptide location with respect to the bacteria (right column). A 20  $\mu\text{m}$  scale bar is shown for all images. **(A)** A control sample containing 200  $\mu\text{M}$  FITC-hLL-37<sub>17-29</sub> with no bacterial cells, showing no visible fluorescent signals. **(B)** A control sample containing *M. luteus* with no peptide, showing the blue stained bacterial cells. **(C-F)** *M. luteus* with: **(C-D)** 30  $\mu\text{M}$  FITC-hLL-37<sub>17-29</sub> and a zoom-in view in panel D, **(E)** 50  $\mu\text{M}$  FITC-hLL-37<sub>17-29</sub> Q22A, **(F)** 150  $\mu\text{M}$  FITC-hLL-37<sub>17-29</sub> I24A or **(G)** 150  $\mu\text{M}$  FITC-hLL-37<sub>17-29</sub> I24S. The FITC-hLL-37<sub>17-29</sub> **(C-D)** and FITC-hLL-37<sub>17-29</sub> Q22A **(E)** aggregated (bright green foci) and co-localized with the bacterial cells. The FITC-hLL-37<sub>17-29</sub> I24A **(F)** and I24S **(G)** inactive mutants (Fig. 3) do not undergo aggregation.

**Figure S11. Human and gorilla LL-37<sub>17-29</sub> share fibrillary architecture but differ in central pore properties**

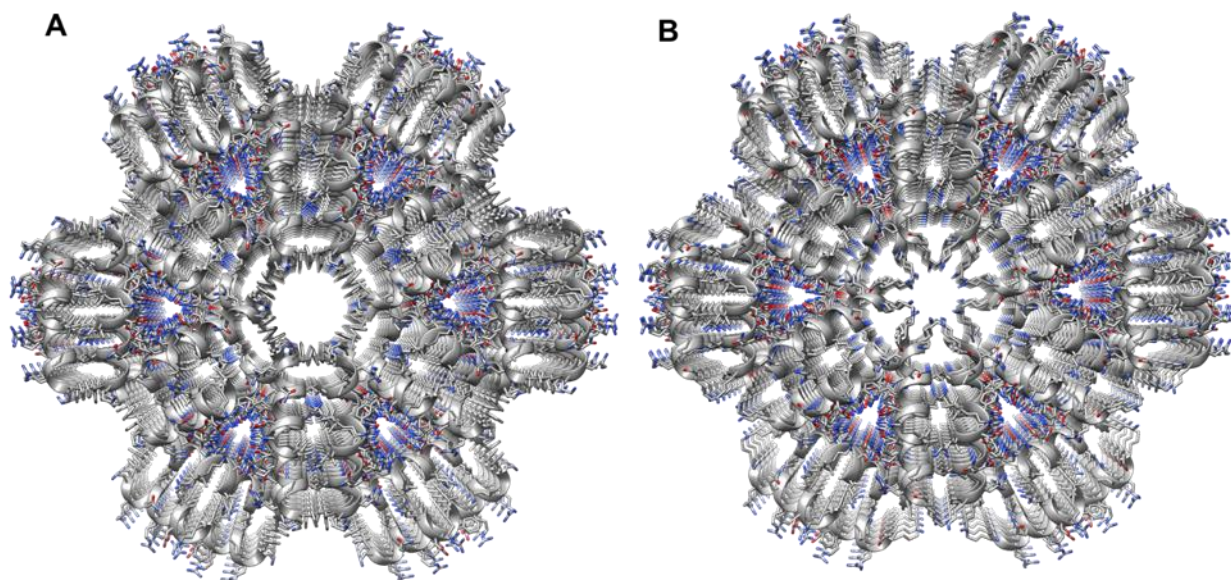

Comparison of human (**A**) and gorilla (**B**) LL-37<sub>17-29</sub> crystal structures, shown in grey ribbons with side chain shown as sticks colored by atom type (oxygen in red and nitrogen in blue). The view is down the fibril axis, showing the hexameric arrangement and the central pore. The overall structure of the two is highly similar (RMSD of 0.15 Å for the asymmetric unit, comprising two helices and a similar space group and unit cell dimensions (Table S1)). The N-termini of the helices, with Phe17 in hLL-37<sub>17-29</sub> or Ser17 in gLL-37<sub>17-29</sub>, and Lys18, lining the central pore. The pore of gLL-37<sub>17-29</sub> is more occluded, due to the orientation of the lysine residues extending into the pore. In the hLL-37<sub>17-29</sub> structure, the lysine residues are almost perpendicular to the cross-section of the pore.

**Figure S12. Structural alignment between human and gorilla LL-37<sub>17-29</sub> and residue flexibility**

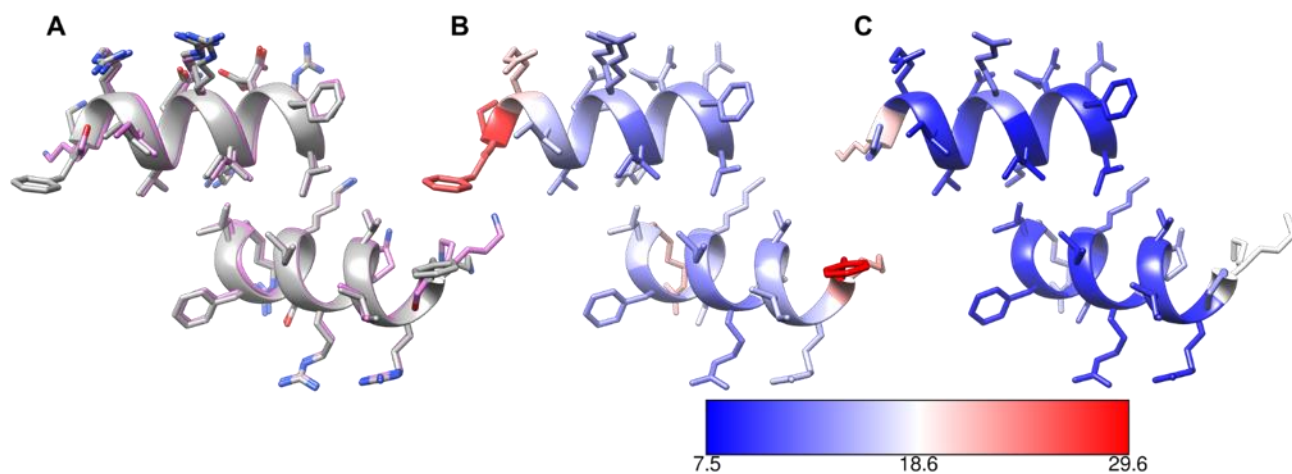

(A) Structural superimposition of the asymmetric unit, comprising two helices, of the human (grey) and gorilla (pink) LL-37<sub>17-29</sub> crystal structures, revealing a very similar structure with RMSD of 0.15 Å. (B-C) Human (B) and gorilla (C) LL-37<sub>17-29</sub> in the same orientation as in panel A, colored by average B (temperature) factors per residue, according to the scale bar, with blue-to-red indicating stable-to-flexible (ordered-to-disordered).

**Figure S13. Electron micrographs of *M. luteus* incubated with hLL-37<sub>17-29</sub> mutants**

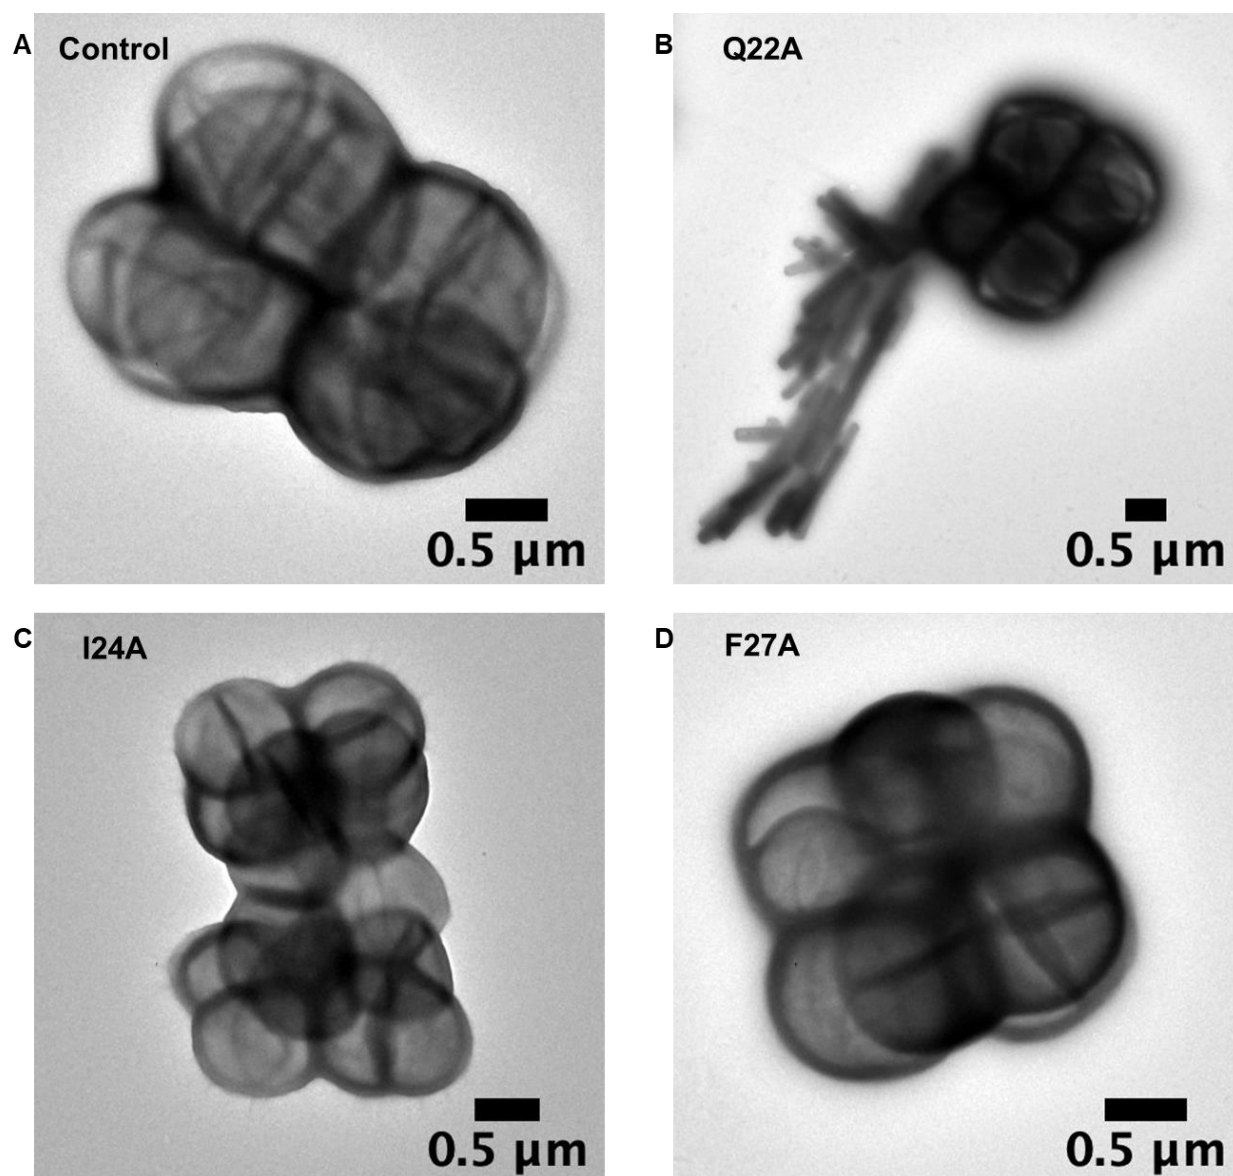

Transmission electron micrographs of *M. luteus* incubated with hLL-37<sub>17-29</sub> mutants. (A) A control sample containing *M. luteus* with no peptide added. (B) The hLL-37<sub>17-29</sub> Q22A active mutant (50 μM; antibacterial activity is shown in Fig. 3) incubated with the bacteria displayed nano-fiber-like assemblies around and contacting the bacterial cells. The hLL-37<sub>17-29</sub> I24A (C) and F27A (D) inactive mutants, incubated at 100 μM with the bacteria, did not assemble.



**Figure S14. Structural location of mutated LL-37<sub>17-29</sub> residues**

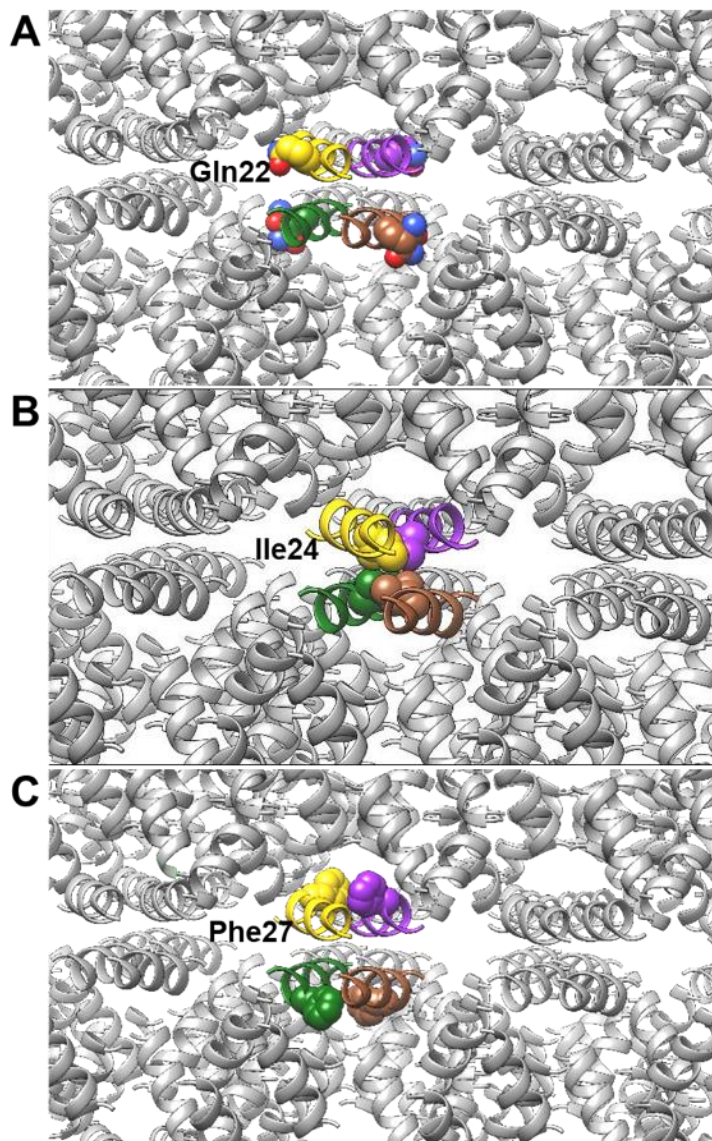

A zoom-in view of the fibrillar assembly, focusing on one four-helix bundle, with each helix colored differently. In each panel, the mutant residue tested is shown using space-filling model. **(A)** Gln22 faces outward from the bundle and forming very few contacts with adjacent helices, with only 13% of its SASA buried in the assembly (Table S2). **(B)** Ile24 is completely buried (95% of its SASA) inside the four-helix bundle. **(C)** Phe27 faces away from the bundle yet contacts both other residues on the same bundle and adjacent helices, with 85% of its SASA buried in the assembly (Table S2).

**Figure S15. ThT fluorescence kinetics of hLL-37<sub>17-29</sub> and PSM $\alpha$ 3**

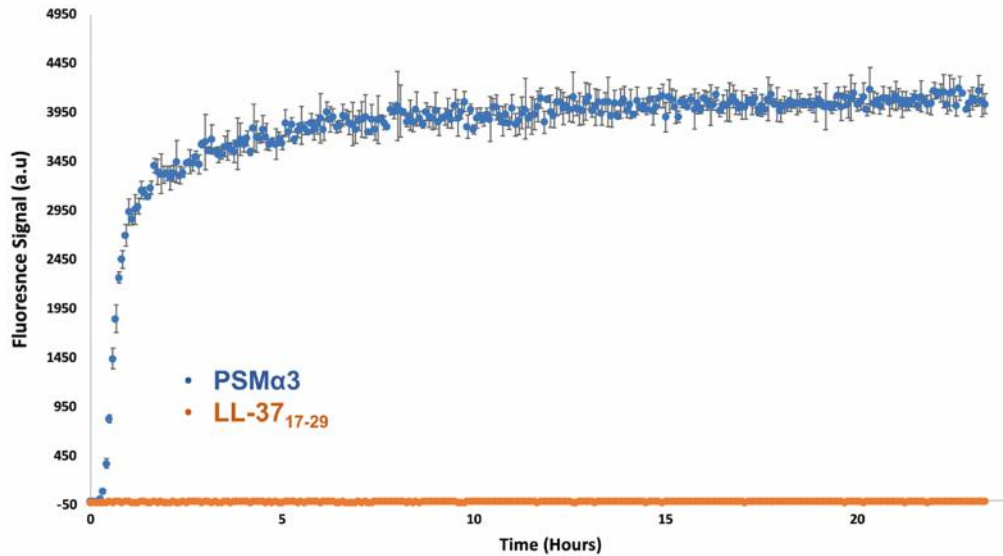

ThT (200  $\mu$ M) binding to hLL-37<sub>17-29</sub> (orange curve) and PSM $\alpha$ 3, (blue curve) (50  $\mu$ M dissolved in 10 mM sodium phosphate, pH 8.0 and 150 mM sodium chloride). PSM $\alpha$ 3 showed ThT binding, indicating rapid fibril formation, while hLL-37<sub>17-29</sub> failed to bind ThT. Measurements were performed in triplicates and values were averaged, appropriate blanks were subtracted, and the resulting values were plotted against time. Error bars represent standard errors of the mean. The entire experiment was repeated at least three times, on different days.

**Table S1. Data collection and refinement statistics (molecular replacement)**

|                                           | <b>Gorilla LL-37<sub>17-29</sub></b> | <b>Human LL-37<sub>17-29</sub></b> |
|-------------------------------------------|--------------------------------------|------------------------------------|
| PDB accession code                        | 6S6N                                 | 6S6M                               |
| Beamline                                  | ESRF ID23-2                          | EMBL P14 PETRA III                 |
| Date                                      | May 12, 2018                         | July 7, 2018                       |
|                                           |                                      |                                    |
| <b>Data collection</b>                    |                                      |                                    |
| Space group                               | P 61 2 2                             | P 61 2 2                           |
| Cell dimensions                           |                                      |                                    |
| <i>a</i> , <i>b</i> , <i>c</i> (Å)        | 41.15 41.15 57.28                    | 41.45 41.45 57.47                  |
| $\alpha$ , $\beta$ , $\gamma$ (°)         | 90.0 90.0 120.0                      | 90.0 90.0 120.0                    |
| Wavelength (Å)                            | 0.873                                | 0.976                              |
| Resolution (Å)                            | 57.3-1.1 (1.13-1.10)                 | 35.9-1.35 (1.39-1.35)              |
| R-factor observed (%)                     | 5.6 (55.2)                           | 5.6 (78.8)                         |
| <sup>b</sup> <i>R</i> <sub>meas</sub> (%) | 5.7 (59.8)                           | 6.0 (83.9)                         |
| <i>I</i> / $\sigma$                       | 31.1 (3.1)                           | 21.5 (3.5)                         |
| Total reflections                         | 222293 (5198)                        | 59815 (4470)                       |
| Unique reflections                        | 12186 (808)                          | 6782 (505)                         |
| Completeness (%)                          | 99.4 (92.1)                          | 98.7 (99.8)                        |
| Redundancy                                | 18.2 (6.4)                           | 8.8 (8.9)                          |
| <sup>c</sup> CC <sub>1/2</sub> (%)        | 99.9 (90.4)                          | 99.7 (89.7)                        |
|                                           |                                      |                                    |
| <b>Refinement</b>                         |                                      |                                    |
| Resolution (Å)                            | 35.6-1.1 (1.13-1.10)                 | 19.5-1.35 (1.39-1.35)              |
| Completeness (%)                          | 99.4 (92.1)                          | 98.7 (99.8)                        |
| <sup>d</sup> No. reflections              | 10967 (727)                          | 6103 (452)                         |
| <sup>e</sup> <i>R</i> <sub>work</sub> (%) | 16.0 (47.8)                          | 23.2 (39.9)                        |
| <i>R</i> <sub>free</sub> (%)              | 17.9 (55.9)                          | 26.8 (39.2)                        |
| No. atoms                                 | 307                                  | 300                                |
| Protein                                   | 123 (Chain A)<br>128 (Chain B)       | 122 (Chain A)<br>147 (Chain B)     |
| Water                                     | 56                                   | 31                                 |
| <i>B</i> -factors                         |                                      |                                    |
| Protein                                   | 11.4 (Chain A)<br>10.5 (Chain B)     | 17.2 (Chain A)<br>16.3 (Chain B)   |
| Water                                     | 28.8                                 | 28.1                               |
| R.m.s. deviations                         |                                      |                                    |
| Bond lengths (Å)                          | 0.014                                | 0.011                              |
| Bond angles (°)                           | 1.708                                | 1.613                              |
| Clash score (83)                          | 1.83                                 | 1.71                               |
| Molprobity score (83)                     | 0.94                                 | 0.92                               |
| Molprobity percentile (83)                | 99 <sup>th</sup> percentile          | 99 <sup>th</sup> percentile        |
| Number of xtals used for scaling          | One crystals                         | One crystal                        |

Values in parentheses are for highest-resolution shell.

- <sup>(b)</sup> R-meas is a redundancy-independent R-factor defined in (84).
- <sup>(c)</sup> CC<sub>1/2</sub> is percentage of correlation between intensities from random half-datasets (85).
- <sup>(d)</sup> Number of reflections corresponds to the working set.
- <sup>(e)</sup> Rwork corresponds to working set.

**Table S2. Calculations of the solvent accessible surface area (SASA) per residue in the crystal structure of hLL-37<sub>17-29</sub>**

| Residue on LL-37 <sub>17-29</sub> | Average percentage of area buried within the four-helix bundle <sup>1</sup> | Average percentage of area buried within the fibrillar assembly <sup>2</sup> | Average percentage of the residue area on the four-helix bundle buried by surrounding helices in the fibrillar assembly <sup>3</sup> | Percentage of area buried within the four-helix bundle versus the area buried in the fibrillar assembly <sup>4</sup> |
|-----------------------------------|-----------------------------------------------------------------------------|------------------------------------------------------------------------------|--------------------------------------------------------------------------------------------------------------------------------------|----------------------------------------------------------------------------------------------------------------------|
| Phe17                             | 39%                                                                         | 57%                                                                          | 30%                                                                                                                                  | 27%                                                                                                                  |
| Lys18                             | 24%                                                                         | 40%                                                                          | 21%                                                                                                                                  | 19%                                                                                                                  |
| Arg19                             | 5%                                                                          | 58%                                                                          | 55%                                                                                                                                  | 4%                                                                                                                   |
| Ile20                             | 59%                                                                         | 92%                                                                          | 81%                                                                                                                                  | 11%                                                                                                                  |
| Val21                             | 87%                                                                         | 89%                                                                          | 21%                                                                                                                                  | 68%                                                                                                                  |
| Gln22                             | 0%                                                                          | 13%                                                                          | 13%                                                                                                                                  | 0%                                                                                                                   |
| Arg23                             | 21%                                                                         | 78%                                                                          | 73%                                                                                                                                  | 6%                                                                                                                   |
| Ile24                             | 95%                                                                         | 96%                                                                          | 0%                                                                                                                                   | 96%                                                                                                                  |
| Lys25                             | 46%                                                                         | 53%                                                                          | 13%                                                                                                                                  | 40%                                                                                                                  |
| Asp26                             | 0%                                                                          | 71%                                                                          | 71%                                                                                                                                  | 0%                                                                                                                   |
| Phe27                             | 59%                                                                         | 85%                                                                          | 64%                                                                                                                                  | 21%                                                                                                                  |
| Leu28                             | 88%                                                                         | 98%                                                                          | 83%                                                                                                                                  | 15%                                                                                                                  |
| Arg29                             | 7%                                                                          | 64%                                                                          | 61%                                                                                                                                  | 3%                                                                                                                   |

<sup>1</sup> The number indicated is the percentage of the SASA per residue on an isolated helix versus the SASA of this residue within the four-helix bundle, averaged for the two chains. The higher the indicated percentage, the more buried the residue is on an isolated helix by surrounding helices within the four-helix bundle.

<sup>2</sup> The number indicated is the percentage of the SASA per residue on an isolated helix versus the SASA of this residue within the fibrillar assembly, averaged for the two chains. The higher the indicated percentage, the more buried the residue is on an isolated helix by surrounding helices within the fibrillar assembly.

<sup>3</sup> The number indicated is the percentage of the SASA per residue on the four-helix bundle buried by surrounding helices in the fibrillar assembly, averaged for the four chains. The higher the indicated percentage, the more buried the residue is by surrounding helices within the fibrillar assembly but not by other helices on the same four-helix bundle. This indicates the contact of each residue with helices surrounding the four-helix bundle.

<sup>4</sup> The percentage of SASA buried in the four-helix bundle versus the SASA buried in the fibrillar assembly. The higher the percentage difference per residue, the more contacts there are with surrounding residues on the four-helix bundle compared to residues on helices outside the bundle.

### **Movie S1. Crystal structure of hLL-3717-29 and the assembly of the peptide into fibril**

The movie displays the hexameric crystal structure of hLL-37<sub>17-29</sub> from different orientations and emphases. The helices are shown in grey ribbon presentation, with one representative four-helix bundle colored pink. The movie starts with a view into the fibril axis and zooms in to the representative bundle, showing its side chains. The orientation is then rotated 90° for a view along the fibril axis, and then further rotated along the fibril axis to display the overall helical assembly. The view is again zoomed into the bundle, showing side chains. The orientation is then rotated back to a view into the fibril axis.

### **Movie S2. Confocal microscopy imaging of live *M. luteus* incubated with FITC-hLL-37<sub>17-29</sub>**

A series of confocal microscopy images was taken for about two hours, at intervals of 10 minutes, and then merged into a movie. The images reveal a rapid accumulation of FITC-hLL-37<sub>17-29</sub> on the bacteria cells and the formation of peptide foci, indicating rapid aggregation in the presence of *M. luteus*. Depletion of the Hoechst blue signal was observed for bacterial cells localized with the peptide (green), indicating cell rupture and the release of DNA (86, 87). Bacterial cells with no accumulation of the peptide maintained a strong Hoechst blue signal.

## References

1. Y. Shai, Mode of action of membrane active antimicrobial peptides. *Biopolymers* **66**, 236-248 (2002).
2. Z. Ye *et al.*, Self-assembly dynamics and antimicrobial activity of all l- and d-amino acid enantiomers of a designer peptide. *Nanoscale* **11**, 266-275 (2018).
3. B. L. Kagan *et al.*, Antimicrobial properties of amyloid peptides. *Mol Pharm* **9**, 708-717 (2012).
4. M. Landreh, J. Johansson, H. Jornvall, Separate molecular determinants in amyloidogenic and antimicrobial peptides. *J Mol Biol* **426**, 2159-2166 (2014).
5. H. Jang *et al.*, Antimicrobial protegrin-1 forms amyloid-like fibrils with rapid kinetics suggesting a functional link. *Biophys J* **100**, 1775-1783 (2011).
6. H. Zhao *et al.*, Interaction of the antimicrobial peptide pheromone Plantaricin A with model membranes: implications for a novel mechanism of action. *Biochim Biophys Acta* **1758**, 1461-1474 (2006).
7. C. Auvynet *et al.*, Structural requirements for antimicrobial versus chemoattractant activities for dermaseptin S9. *The FEBS journal* **275**, 4134-4151 (2008).
8. Y. A. Domanov, P. K. Kinnunen, Antimicrobial peptides temporins B and L induce formation of tubular lipid protrusions from supported phospholipid bilayers. *Biophysical journal* **91**, 4427-4439 (2006).
9. C. M. Dobson, Protein misfolding, evolution and disease. *Trends Biochem. Sci.* **24**, 329-332 (1999).
10. D. Eisenberg, M. Jucker, The amyloid state of proteins in human diseases. *Cell* **148**, 1188-1203 (2012).
11. S. J. Soscia *et al.*, The Alzheimer's disease-associated amyloid beta-protein is an antimicrobial peptide. *PLoS One* **5**, e9505 (2010).
12. D. K. Kumar *et al.*, Amyloid-beta peptide protects against microbial infection in mouse and worm models of Alzheimer's disease. *Science translational medicine* **8**, 340ra372 (2016).
13. S. C. Park *et al.*, Functional characterization of alpha-synuclein protein with antimicrobial activity. *Biochem Biophys Res Commun* **478**, 924-928 (2016).
14. E. L. Beatman *et al.*, Alpha-Synuclein Expression Restricts RNA Viral Infections in the Brain. *Journal of virology* **90**, 2767-2782 (2015).
15. K. Bourgade *et al.*, beta-Amyloid peptides display protective activity against the human Alzheimer's disease-associated herpes simplex virus-1. *Biogerontology* **16**, 85-98 (2015).
16. Y. Hirakura, I. Carreras, J. D. Sipe, B. L. Kagan, Channel formation by serum amyloid A: a potential mechanism for amyloid pathogenesis and host defense. *Amyloid* **9**, 13-23 (2002).
17. N. B. Last, A. D. Miranker, Common mechanism unites membrane poration by amyloid and antimicrobial peptides. *Proc Natl Acad Sci U S A* **110**, 6382-6387 (2013).
18. M. R. White *et al.*, Alzheimer's associated beta-amyloid protein inhibits influenza A virus and modulates viral interactions with phagocytes. *PLoS One* **9**, e101364 (2014).
19. M. Zhang, J. Zhao, J. Zheng, Molecular understanding of a potential functional link between antimicrobial and amyloid peptides. *Soft Matter* **10**, 7425-7451 (2014).

20. R. Sood, Y. Domanov, M. Pietiainen, V. P. Kontinen, P. K. Kinnunen, Binding of LL-37 to model biomembranes: insight into target vs host cell recognition. *Biochim Biophys Acta* **1778**, 983-996 (2008).
21. M. Zhang *et al.*, The Critical Role of the Antimicrobial Peptide LL-37/CRAMP in Protection of Colon Microbiota Balance, Mucosal Homeostasis, Anti-Inflammatory Responses, and Resistance to Carcinogenesis. *Critical Reviews™ in Immunology* **39**, (2019).
22. A. Krasnodembskaya *et al.*, Antibacterial Effect of Human Mesenchymal Stem Cells Is Mediated in Part from Secretion of the Antimicrobial Peptide LL-37. *Stem Cells* **28**, 2229-2238 (2010).
23. S. B. Coffelt *et al.*, The pro-inflammatory peptide LL-37 promotes ovarian tumor progression through recruitment of multipotent mesenchymal stromal cells. *Proceedings of the National Academy of Sciences of the United States of America* **106**, 3806-3811 (2009).
24. K. Suzuki *et al.*, Human host defense cathelicidin peptide LL-37 enhances the lipopolysaccharide uptake by liver sinusoidal endothelial cells without cell activation. *The Journal of Immunology* **196**, 1338-1347 (2016).
25. X. Zhang, G. Bajic, G. R. Andersen, S. H. Christiansen, T. Vorup-Jensen, The cationic peptide LL-37 binds Mac-1 (CD11b/CD18) with a low dissociation rate and promotes phagocytosis. *Biochimica et Biophysica Acta (BBA)-Proteins and Proteomics* **1864**, 471-478 (2016).
26. Z. Chen *et al.*, Design and antimicrobial activities of LL-37 derivatives inhibiting the formation of *Streptococcus mutans* biofilm. *Chemical biology & drug design*, (2019).
27. E. Y. Lee *et al.*, Helical antimicrobial peptides assemble into protofibril scaffolds that present ordered dsDNA to TLR9. *Nature communications* **10**, 1012 (2019).
28. G. Wang, B. Mishra, R. F. Epan, R. M. Epan, High-quality 3D structures shine light on antibacterial, anti-biofilm and antiviral activities of human cathelicidin LL-37 and its fragments. *Biochim Biophys Acta* **1838**, 2160-2172 (2014).
29. J. Johansson, G. H. Gudmundsson, M. E. Rottenberg, K. D. Berndt, B. Agerberth, Conformation-dependent antibacterial activity of the naturally occurring human peptide LL-37. *J Biol Chem* **273**, 3718-3724 (1998).
30. M. Shahmiri *et al.*, Membrane Core-Specific Antimicrobial Action of Cathelicidin LL-37 Peptide Switches Between Pore and Nanofibre Formation. *Scientific Reports* **6**, (2016).
31. E. Tayeb-Fligelman *et al.*, The cytotoxic *Staphylococcus aureus* PSMalpha3 reveals a cross-alpha amyloid-like fibril. *Science* **355**, 831-833 (2017).
32. E. Tayeb-Fligelman, N. Salinas, O. Tabachnikov, M. Landau, *Staphylococcus aureus* PSMalpha3 Cross-alpha Fibril Polymorphism and Determinants of Cytotoxicity. *Structure*, (2020).
33. R. Malishev *et al.*, Reciprocal Interactions between Membrane Bilayers and *S. aureus* PSMalpha3 Cross-alpha Amyloid Fibrils Account for Species-Specific Cytotoxicity. *J Mol Biol* **430**, 1431-1441 (2018).
34. G. Y. Cheung *et al.*, Insight into structure-function relationship in phenol-soluble modulins using an alanine screen of the phenol-soluble modulin (PSM) alpha3 peptide. *Faseb j* **28**, 153-161 (2014).
35. N. Salinas, J. P. Colletier, A. Moshe, M. Landau, Extreme amyloid polymorphism in *Staphylococcus aureus* virulent PSMalpha peptides. *Nat Commun* **9**, 3512 (2018).

36. M. F. Burton, P. G. Steel, The chemistry and biology of LL-37. *Natural product reports* **26**, 1572-1584 (2009).
37. R. F. Epand, G. Wang, B. Berno, R. M. Epand, Lipid segregation explains selective toxicity of a series of fragments derived from the human cathelicidin LL-37. *Antimicrobial agents and chemotherapy* **53**, 3705-3714 (2009).
38. K. S. Jang, M. Park, J. Y. Lee, J. S. Kim, Mass spectrometric identification of phenol-soluble modulins in the ATCC(R) 43300 standard strain of methicillin-resistant *Staphylococcus aureus* harboring two distinct phenotypes. *European journal of clinical microbiology & infectious diseases : official publication of the European Society of Clinical Microbiology* **36**, 1151-1157 (2017).
39. D. J. Gonzalez *et al.*, Novel phenol-soluble modulin derivatives in community-associated methicillin-resistant *Staphylococcus aureus* identified through imaging mass spectrometry. *J Biol Chem* **287**, 13889-13898 (2012).
40. D. J. Gonzalez *et al.*, Phenol soluble modulin (PSM) variants of community-associated methicillin-resistant *Staphylococcus aureus* (MRSA) captured using mass spectrometry-based molecular networking. *Molecular & cellular proteomics : MCP* **13**, 1262-1272 (2014).
41. M. Deplanche *et al.*, Phenol-soluble modulin alpha induces G2/M phase transition delay in eukaryotic HeLa cells. *Faseb j* **29**, 1950-1959 (2015).
42. H. S. Joo, G. Y. Cheung, M. Otto, Antimicrobial activity of community-associated methicillin-resistant *Staphylococcus aureus* is caused by phenol-soluble modulin derivatives. *J Biol Chem* **286**, 8933-8940 (2011).
43. A. Schmidtchen, I. M. Frick, E. Andersson, H. Tapper, L. Bjorck, Proteinases of common pathogenic bacteria degrade and inactivate the antibacterial peptide LL-37. *Mol Microbiol* **46**, 157-168 (2002).
44. Y. Kai-Larsen, B. Agerberth, The role of the multifunctional peptide LL-37 in host defense. *Frontiers in bioscience: a journal and virtual library* **13**, 3760-3767 (2008).
45. G. Rajasekaran, E. Y. Kim, S. Y. Shin, LL-37-derived membrane-active FK-13 analogs possessing cell selectivity, anti-biofilm activity and synergy with chloramphenicol and anti-inflammatory activity. *Biochimica et biophysica acta. Biomembranes* **1859**, 722-733 (2017).
46. K. Yamasaki *et al.*, Kallikrein-mediated proteolysis regulates the antimicrobial effects of cathelicidins in skin. *Faseb j* **20**, 2068-2080 (2006).
47. M. Murakami, B. Lopez-Garcia, M. Braff, R. A. Dorschner, R. L. Gallo, Postsecretory processing generates multiple cathelicidins for enhanced topical antimicrobial defense. *J Immunol* **172**, 3070-3077 (2004).
48. X. Li, Y. Li, H. Han, D. W. Miller, G. Wang, Solution structures of human LL-37 fragments and NMR-based identification of a minimal membrane-targeting antimicrobial and anticancer region. *J Am Chem Soc* **128**, 5776-5785 (2006).
49. J. M. Schuurmans, A. S. N. Hayali, B. B. Koenders, B. H. ter Kuile, Variations in MIC value caused by differences in experimental protocol. *Journal of microbiological methods* **79**, 44-47 (2009).
50. E. Sancho-Vaello *et al.*, Structural remodeling and oligomerization of human cathelicidin on membranes suggest fibril-like structures as active species. *Sci Rep* **7**, 15371 (2017).
51. S. Kumar, R. Nussinov, Close-range electrostatic interactions in proteins. *ChemBiochem* **3**, 604-617 (2002).



52. N. Papo, Y. Shai, Can we predict biological activity of antimicrobial peptides from their interactions with model phospholipid membranes? *Peptides* **24**, 1693-1703 (2003).
53. Y. Shai, From innate immunity to de-novo designed antimicrobial peptides. *Current pharmaceutical design* **8**, 715-725 (2002).
54. M. Stark, L. P. Liu, C. M. Deber, Cationic hydrophobic peptides with antimicrobial activity. *Antimicrob Agents Chemother* **46**, 3585-3590 (2002).
55. A. G. Street, S. L. Mayo, Pairwise calculation of protein solvent-accessible surface areas. *Folding and Design* **3**, 253-258 (1998).
56. W. Hasel, T. F. Hendrickson, W. C. Still, A rapid approximation to the solvent accessible surface areas of atoms. *Tetrahedron Computer Methodology* **1**, 103-116 (1988).
57. L. M. Yin, M. A. Edwards, J. Li, C. M. Yip, C. M. Deber, Roles of hydrophobicity and charge distribution of cationic antimicrobial peptides in peptide-membrane interactions. *Journal of Biological Chemistry* **287**, 7738-7745 (2012).
58. I. Nagaoka *et al.*, Augmentation of the lipopolysaccharide-neutralizing activities of human cathelicidin CAP18/LL-37-derived antimicrobial peptides by replacement with hydrophobic and cationic amino acid residues. *Clin Diagn Lab Immunol* **9**, 972-982 (2002).
59. L. P. Blanco, M. L. Evans, D. R. Smith, M. P. Badtke, M. R. Chapman, Diversity, biogenesis and function of microbial amyloids. *Trends in microbiology* **20**, 66-73 (2012).
60. M. Pasupuleti *et al.*, in *PLoS One*. (2009), vol. 4.
61. D. Andreu, L. Rivas, Animal antimicrobial peptides: an overview. *Biopolymers* **47**, 415-433 (1998).
62. M. Zasloff, Antimicrobial peptides of multicellular organisms. *nature* **415**, 389 (2002).
63. A. A. NAWANGSIH, I. DAMAYANTI, S. WIYONO, J. G. KARTIKA, Selection and characterization of endophytic bacteria as biocontrol agents of tomato bacterial wilt disease. *Hayati Journal of Biosciences* **18**, 66-70 (2011).
64. E. Wegel *et al.*, Imaging cellular structures in super-resolution with SIM, STED and Localisation Microscopy: A practical comparison. *Sci Rep* **6**, 27290 (2016).
65. J. Cardinale, Histogram-based background subtractor for ImageJ. *ETH Zurich, Switzerland*, (2010).
66. E. o. S. Gedraite, M. Hadad, in *Proceedings ELMAR-2011*. (IEEE, 2011), pp. 393-396.
67. Y. Zhang, J. Schmidt, Y. Talmon, J. L. Zakin, Co-solvent effects on drag reduction, rheological properties and micelle microstructures of cationic surfactants. *Journal of Colloid and Interface Science* **286**, 696-709 (2005).
68. Y. Kaneko, R. Danev, K. Nitta, K. Nagayama, In vivo subcellular ultrastructures recognized with Hilbert differential contrast transmission electron microscopy. *J Electron Microsc (Tokyo)* **54**, 79-84 (2005).
69. M. Tosaka, R. Danev, K. Nagayama, Application of Phase Contrast Transmission Microscopic Methods to Polymer Materials. *Macromolecules* **38**, 7884-7886 (2005).
70. W. Kabsch, XDS. *Acta Crystallogr D Biol Crystallogr* **66**, 125-132 (2010).
71. A. J. McCoy *et al.*, Phaser crystallographic software. *Journal of Applied Crystallography* **40**, 658-674 (2007).
72. M. D. Winn *et al.*, Overview of the CCP4 suite and current developments. *Acta Crystallogr D Biol Crystallogr* **67**, 235-242 (2011).
73. P. Emsley, K. Cowtan, Coot: model-building tools for molecular graphics. *Acta Crystallogr. D Biol. Crystallogr.* **60**, 2126-2132 (2004).

74. E. F. Pettersen *et al.*, UCSF Chimera--a visualization system for exploratory research and analysis. *Journal of computational chemistry* **25**, 1605-1612 (2004).
75. J. Rozewicki, S. Li, K. M. Amada, D. M. Standley, K. Katoh, MAFFT-DASH: integrated protein sequence and structural alignment. *Nucleic acids research*, (2019).
76. C. D. Livingstone, G. J. Barton, Protein sequence alignments: a strategy for the hierarchical analysis of residue conservation. *Comput Appl Biosci* **9**, 745-756 (1993).
77. E. Gasteiger *et al.*, in *The proteomics protocols handbook*. (Springer, 2005), pp. 571-607.
78. J. Kyte, R. F. Doolittle, A simple method for displaying the hydropathic character of a protein. *J Mol Biol* **157**, 105-132 (1982).
79. E. Jurrus *et al.*, Improvements to the APBS biomolecular solvation software suite. *Protein Science* **27**, 112-128 (2018).
80. R. Gautier, D. Douguet, B. Antony, G. Drin, HELIQUEST: a web server to screen sequences with specific alpha-helical properties. *Bioinformatics (Oxford, England)* **24**, 2101-2102 (2008).
81. B. Lee, F. M. Richards, The interpretation of protein structures: estimation of static accessibility. *J Mol Biol* **55**, 379-400 (1971).
82. E. B. Saff, A. B. Kuijlaars, Distributing many points on a sphere. *The mathematical intelligencer* **19**, 5-11 (1997).
83. V. B. Chen *et al.*, MolProbity: all-atom structure validation for macromolecular crystallography. *Acta Crystallogr D Biol Crystallogr* **66**, 12-21 (2010).
84. K. Diederichs, P. A. Karplus, Improved R-factors for diffraction data analysis in macromolecular crystallography. *Nature structural biology* **4**, 269-275 (1997).
85. P. A. Karplus, K. Diederichs, Linking crystallographic model and data quality. *Science* **336**, 1030-1033 (2012).
86. B. Mojsoska, G. Carretero, S. Larsen, R. V. Mateiu, H. Jenssen, Peptoids successfully inhibit the growth of gram negative E. coli causing substantial membrane damage. *Sci Rep* **7**, 42332 (2017).
87. M. Yasir, D. Dutta, M. D. Willcox, Comparative mode of action of the antimicrobial peptide melimine and its derivative Mel4 against *Pseudomonas aeruginosa*. *Scientific reports* **9**, 7063 (2019).
